# Supplementary material for: Divergent Transcriptomic Effects of Allopregnanolone in Postpartum Depression
Source: Genes (Basel). 2023 Jun 8;14(6):1234. doi: 10.3390/genes14061234 (PMC10298697; doi:10.3390/genes14061234)
Supplement: Supplementary file 1 [file genes-14-01234-s001.zip]

Archive with 5 entries (5 files):
- PPD_ALLO_SupplementalFiguresTables_05.15.23.pdf
- TableS1_DMSO_PPDvControl.xlsx
- TableS2_Allo_PPDvControl.xlsx
- TableS3_Control_AllovDMSO.xlsx
- TableS4_PPD_AllovDMSO.xlsx
