# Supplementary material for: Divergent Transcriptomic Effects of Allopregnanolone in Postpartum Depression
Source: Genes (Basel). 2023 Jun 8;14(6):1234. doi: 10.3390/genes14061234 (PMC10298697; doi:10.3390/genes14061234)
Supplement: Supplementary file 1 [file genes-14-01234-s001.zip › TableS1_DMSO_PPDvControl.xlsx]

## Sheet: DMSO_PPDvControl
ID	DMSO: Control Avg (log2)	DMSO: PPD Avg (log2)	Fold Change	P-val	FDR P-val
C5orf15	6.31	5.94	-1.29	0.0001	0.6513
GSTT1	2.03	0	-4.07	0.0001	0.6513
SLC16A6	2.7	2.09	-1.53	0.0002	0.7672
TBX6	2.81	2.32	-1.41	0.0002	0.7672
EDARADD	0.7	1.95	2.37	0.0003	0.8248
PLTP	1.98	1.3	-1.61	0.0005	0.9741
EHHADH	2.21	1.62	-1.51	0.0005	0.9741
EXOG	2.17	1.71	-1.38	0.0006	1
LOXL2	1.24	0.67	-1.49	0.0007	1
NPNT	0.89	2.08	2.27	0.001	1
MYO1E	8.8	8.48	-1.25	0.0011	1
CDCA7L	4.05	3.54	-1.42	0.0011	1
NUGGC	4.49	3.38	-2.16	0.0013	1
PQLC3	3.41	3.06	-1.27	0.0014	1
ZNF792	3.51	3.04	-1.39	0.0015	1
TMEM106B	4.1	3.58	-1.44	0.0015	1
ANKRD31	0	0.4	1.32	0.002	1
TP53BP2	2.96	3.44	1.39	0.0021	1
C16orf54	3.72	3.14	-1.5	0.0022	1
ICOS	0.1	1.51	2.66	0.0022	1
PPP1R36	0.33	0	-1.26	0.0025	1
DEGS2	0.08	0.59	1.42	0.0025	1
ZNF300	1.43	0.35	-2.12	0.0028	1
FLJ33630	2.66	2.18	-1.39	0.0029	1
ENTPD1	4.51	5.02	1.42	0.0029	1
STRADB	4.48	3.99	-1.41	0.003	1
LOC391322	2.4	0	-5.26	0.0032	1
ZNF229	0.94	0.51	-1.34	0.0033	1
ATP13A1	5.5	5.09	-1.34	0.0033	1
CIDECP	3.05	3.43	1.31	0.0034	1
TNFRSF9	3.85	5.11	2.39	0.0037	1
ZNF566	1.94	1.49	-1.36	0.0039	1
CD80	8.63	8.99	1.29	0.0039	1
ILDR1	3.59	2.98	-1.53	0.0039	1
TOP3A	4.05	3.56	-1.4	0.004	1
CORO2A	2.41	1.44	-1.95	0.004	1
MEI1	1.46	0.78	-1.61	0.0041	1
ZNF660	0.69	0.28	-1.32	0.0042	1
BMP8B	3.71	2.47	-2.36	0.0043	1
NCAPH	2.64	2.17	-1.39	0.0047	1
SH2B2	5.86	5.15	-1.64	0.0048	1
CDNF	1.25	0.87	-1.3	0.0049	1
SCAMP1	3	2.55	-1.37	0.0049	1
C9orf85	3.23	2.85	-1.3	0.0053	1
ZNF395	7.36	6.94	-1.34	0.0056	1
PLCL2	5.56	5.11	-1.36	0.0056	1
ACAA1	3.72	4.14	1.33	0.006	1
LHFPL2	5.21	4.66	-1.47	0.0063	1
C11orf35	4.09	3.54	-1.46	0.0064	1
LPIN2	6.53	6.2	-1.26	0.0067	1
PDGFRB	2.12	1.27	-1.81	0.0069	1
GUCY1A3	2.67	1.72	-1.93	0.0069	1
HCG4	0.5	0.97	1.39	0.0073	1
CKLF	0.07	0.51	1.36	0.0074	1
TMEM91	0.68	0.27	-1.33	0.0074	1
ADCY1	0.78	1.89	2.15	0.0075	1
DEC1	0	0.65	1.57	0.0078	1
BTG2	7.94	7.36	-1.5	0.0079	1
NCS1	0.4	0.98	1.5	0.0083	1
CDC37L1	4.52	4.86	1.26	0.0083	1
NLRP1	3.87	3.01	-1.82	0.0085	1
PER3	0.4	0.77	1.29	0.0086	1
ACTL7A	0	0.39	1.31	0.0086	1
CAMKK2	3.31	2.65	-1.57	0.0088	1
ALG13	5.01	4.55	-1.38	0.0089	1
FANCI	3.44	2.98	-1.37	0.0091	1
LOC284889	0.94	0.19	-1.68	0.0093	1
LOC100133091	2.14	1.77	-1.29	0.0094	1
RNF208	2.67	2.2	-1.38	0.0094	1
CDKN2C	4.41	5.04	1.56	0.0094	1
JUNB	7.67	7.07	-1.52	0.0097	1
SERTAD3	4.78	4.44	-1.26	0.0097	1
TAZ	2.8	2.46	-1.27	0.0098	1
ETV7	1.36	0.77	-1.5	0.0099	1
VOPP1	4.48	4.13	-1.27	0.0101	1
SMPD1	1.53	1.95	1.33	0.0104	1
SMAD3	5.85	5.42	-1.35	0.0111	1
LEMD3	5.41	5.08	-1.25	0.0112	1
L3MBTL4	3.66	4.12	1.38	0.0112	1
NHSL2	0.43	0	-1.35	0.0117	1
MED15	4.24	3.82	-1.34	0.0118	1
AIM2	4.83	4.11	-1.65	0.0119	1
HARBI1	2.97	3.34	1.29	0.012	1
NPPA	0.84	0.47	-1.29	0.012	1
SGSM3	1.96	1.6	-1.28	0.0122	1
TRERF1	5.4	5.06	-1.27	0.0124	1
PEX19	1.85	2.24	1.32	0.0125	1
C10orf10	3.92	3.11	-1.75	0.0127	1
KDELR3	1.68	1.3	-1.3	0.0129	1
DOCK4	1.52	2.35	1.79	0.0133	1
DDT	5.95	5.56	-1.31	0.0134	1
C9orf129	0.74	0.35	-1.31	0.0134	1
TMEM66	6.85	6.52	-1.26	0.0135	1
HIVEP2	4.73	4.17	-1.47	0.0135	1
DUSP2	9.33	8.82	-1.42	0.0135	1
CELSR3	2.6	2.03	-1.48	0.0139	1
SLC2A8	0.8	0.43	-1.29	0.0139	1
HS3ST3A1	0	0.49	1.41	0.014	1
HLA-DRB1	2.8	11.46	404.54	0.014	1
FAAH	1.48	1.02	-1.38	0.014	1
MIER2	4.09	3.66	-1.34	0.0141	1
TNS3	3.96	3.22	-1.67	0.0141	1
GATA3	1.9	2.64	1.67	0.0144	1
LRRC70	0.84	1.33	1.4	0.0145	1
MFGE8	0.66	0.2	-1.38	0.015	1
RRAS	2.41	1.84	-1.48	0.0155	1
APOE	1.29	1.67	1.3	0.0159	1
NEO1	1.14	0.39	-1.67	0.016	1
WNT2	1.16	1.77	1.52	0.0162	1
WDR25	1.01	0.51	-1.42	0.0164	1
PRSS30P	1.32	0.64	-1.6	0.0165	1
MAST4	0	0.37	1.29	0.0166	1
CYSTM1	5.87	5.51	-1.29	0.0166	1
AKAP8	6.06	5.61	-1.37	0.0166	1
INSIG1	4.33	3.92	-1.32	0.0168	1
TPI1P3	3.21	2.83	-1.3	0.0169	1
NCOR1	4.47	3.96	-1.42	0.0169	1
GPC2	1.39	1.89	1.42	0.0172	1
LOC648809	1.22	2.33	2.16	0.0173	1
ATHL1	7.07	7.42	1.27	0.0173	1
LINC00235	0.59	0.2	-1.31	0.0176	1
TOB2	4.41	3.95	-1.37	0.0177	1
MPC1	5.7	6.16	1.37	0.0178	1
FRG1B	4.35	3.67	-1.6	0.0178	1
PADI2	3.22	2.44	-1.71	0.0179	1
WNT10A	7.2	6.75	-1.36	0.018	1
SUB1	9.47	8.88	-1.51	0.0181	1
GALNS	2.44	1.94	-1.42	0.0182	1
PPIG	7.09	6.55	-1.45	0.0182	1
HIST1H4F	6.88	6.47	-1.34	0.0183	1
HSD3B7	2.11	1.39	-1.64	0.0184	1
P4HA1	6.48	6.1	-1.3	0.0188	1
LOC641367	1.99	1.42	-1.49	0.0192	1
TXNDC11	4.34	3.86	-1.39	0.0194	1
ZNF561	2.81	3.26	1.37	0.0195	1
TMEM79	1.87	1.45	-1.34	0.0195	1
AURKC	0.66	0.31	-1.28	0.0196	1
CENPM	2.52	1.99	-1.44	0.0196	1
TUBB2A	2.42	3.03	1.53	0.0196	1
CCDC146	4.64	5.08	1.35	0.0198	1
FRK	3.66	3.25	-1.33	0.0201	1
ZNF790	1.42	0.9	-1.42	0.0202	1
SMAD7	5.18	4.84	-1.27	0.0203	1
MANEAL	1.72	1.23	-1.41	0.0204	1
TOMM5	0.25	0.61	1.29	0.0209	1
PTPN13	2.26	1.85	-1.33	0.0209	1
CREB5	2.13	2.58	1.36	0.0211	1
C2orf81	0.86	0.5	-1.28	0.0211	1
SGMS1	7.03	6.56	-1.38	0.0213	1
EMR2	1.15	1.94	1.72	0.0214	1
OTUB2	1	0.6	-1.32	0.0217	1
PILRA	5.1	4.47	-1.54	0.022	1
DDTL	1.26	1.92	1.57	0.0222	1
ZCWPW1	2.83	3.24	1.33	0.0223	1
ZC3H6	5.4	5.06	-1.27	0.0228	1
LOC728752	1.48	1.05	-1.35	0.0228	1
DPEP2	2.85	2.18	-1.6	0.0228	1
IRF7	6.23	5.9	-1.26	0.0228	1
SH3PXD2A	5.78	5.32	-1.37	0.0228	1
BANK1	1.89	2.38	1.41	0.0231	1
IL18	1.12	0.48	-1.55	0.0235	1
MLF1	2.37	2.82	1.36	0.0235	1
LOC100129534	0.68	0.24	-1.36	0.0245	1
AAK1	1.17	1.65	1.39	0.0246	1
KIAA0895L	4.5	4.04	-1.37	0.0246	1
SNAP47	2.59	2.22	-1.29	0.0247	1
RGAG4	1.26	0.37	-1.85	0.0249	1
PFKP	4.53	4.06	-1.39	0.025	1
C2orf72	0.52	0.17	-1.27	0.0251	1
C19orf80	0.8	0.44	-1.29	0.0252	1
REEP1	0.17	0.56	1.3	0.0253	1
PIP5K1A	2.06	2.39	1.26	0.026	1
JPH4	1.3	1.76	1.38	0.0261	1
KCNH3	0.37	0.93	1.48	0.0263	1
TNRC6A	3.33	2.86	-1.38	0.0266	1
FEZ1	5.92	6.55	1.55	0.0267	1
GPT	1.3	0.91	-1.32	0.0269	1
RPL23AP32	0.97	0.49	-1.4	0.0269	1
BCAS4	3.77	3.43	-1.27	0.027	1
UBASH3B	2.44	3.45	2.02	0.027	1
ZNF12	3.46	3.05	-1.33	0.0273	1
WNK3	1.01	0.39	-1.54	0.0273	1
ATG10	3.31	3.73	1.34	0.0273	1
KRBA2	1.71	2.05	1.27	0.0274	1
COQ2	3.64	2.98	-1.57	0.0276	1
GBP3	2.28	1.63	-1.56	0.0283	1
STK32C	0.66	1.14	1.39	0.0286	1
GCSAM	7.16	6.75	-1.33	0.0286	1
ARL13B	1.69	1.33	-1.28	0.0287	1
JMJD7	1.63	1.06	-1.49	0.0288	1
MYEOV2	0.96	1.45	1.41	0.0289	1
DUSP10	5.48	5	-1.39	0.0291	1
CKAP4	3.73	3.23	-1.41	0.0293	1
BAIAP3	0.34	0	-1.27	0.0294	1
SFXN4	4.88	5.21	1.25	0.0295	1
RFC5	2.72	2.22	-1.41	0.0298	1
IL1B	3.72	2.83	-1.85	0.0298	1
MYCBPAP	1.07	0.48	-1.5	0.03	1
TLR9	3.63	3.1	-1.45	0.0301	1
IRGQ	1.57	1.98	1.33	0.0303	1
LRRC40	6.1	6.43	1.26	0.0309	1
EPB41L1	0	0.38	1.3	0.031	1
ITPRIPL2	2.63	2.16	-1.38	0.0311	1
FLJ42627	4.44	4.82	1.31	0.0313	1
FBXO46	3.61	3.27	-1.27	0.0316	1
KRBA1	1.86	1.35	-1.42	0.0327	1
HSPA7	3.53	4.27	1.67	0.033	1
RAB30	4.21	3.82	-1.3	0.0332	1
CA2	4.29	3.68	-1.53	0.0332	1
NME8	1.68	2.43	1.68	0.0334	1
MS4A14	1.19	1.6	1.34	0.0334	1
SPIB	5.28	4.79	-1.4	0.0336	1
GHDC	2.07	2.54	1.38	0.0336	1
C9orf172	1.8	1.37	-1.35	0.0336	1
PCNT	4.77	5.33	1.47	0.034	1
TESK1	2.66	2.22	-1.36	0.0346	1
PKIG	1.36	0.92	-1.36	0.0346	1
TMEM132A	1.33	1.78	1.37	0.0346	1
GABRR2	2.65	2.08	-1.48	0.0347	1
LSM6	4.21	3.89	-1.25	0.035	1
MGC12916	1.11	2.34	2.36	0.0354	1
TMEM18	6.64	6.26	-1.3	0.0354	1
SLC17A9	2.82	2.24	-1.5	0.0356	1
HOMER2	0.6	0	-1.52	0.0357	1
RPS3A	12.35	12.75	1.32	0.0357	1
PLOD2	3.63	2.86	-1.71	0.0357	1
KCNMB1	0.58	0.95	1.3	0.036	1
PACS2	1.01	1.52	1.42	0.036	1
METTL21B	2.13	1.67	-1.38	0.036	1
ZFP36L1	6.87	6.5	-1.3	0.0361	1
COL7A1	2.05	2.43	1.31	0.0362	1
RAMP2	0.98	1.37	1.31	0.0364	1
LOC100506083	2.14	1.82	-1.25	0.0365	1
WHAMMP2	2.88	2.54	-1.27	0.0369	1
GRAMD2	0	0.34	1.26	0.0369	1
ZNF324B	4.06	3.71	-1.27	0.0372	1
ZDHHC14	2.68	2.06	-1.54	0.0375	1
EGR1	6.67	6.25	-1.34	0.0381	1
ZC3H12D	5.82	5.45	-1.29	0.0382	1
FAM108B1	0.82	1.17	1.27	0.0385	1
ZNF385C	0.63	1	1.3	0.0386	1
LOC399744	2.13	2.69	1.47	0.0391	1
DCLRE1B	4.29	3.95	-1.27	0.0392	1
PLEKHH3	2.82	2.45	-1.29	0.0393	1
PRX	0.69	0.25	-1.35	0.0395	1
NBPF3	1.36	0.84	-1.43	0.0396	1
APCDD1	0.56	0.22	-1.26	0.0398	1
PTK6	1.02	0.67	-1.28	0.0399	1
IMPACT	3.74	2.85	-1.85	0.0401	1
ZNF343	1.12	0.73	-1.31	0.0402	1
PDGFRL	0.84	1.36	1.43	0.0403	1
ZBTB37	2.68	3.05	1.29	0.0404	1
TMEM242	3.97	3.6	-1.29	0.0404	1
ENO3	3.18	2.86	-1.26	0.0404	1
CPEB1	2.22	1.33	-1.85	0.0405	1
DRAP1	8.85	8.48	-1.29	0.0405	1
ZNF826P	3.21	2.51	-1.63	0.0407	1
RNF148	0.34	0	-1.26	0.0414	1
IGSF3	2.78	3.21	1.35	0.0416	1
PARP15	6.58	7.07	1.41	0.0419	1
SIGLEC14	0.55	0.98	1.35	0.042	1
TP73	2.47	2.04	-1.35	0.043	1
OR2T5	0	1.55	2.92	0.0434	1
ZBTB33	5.97	5.64	-1.26	0.0436	1
ITGAL	6.43	5.77	-1.58	0.0437	1
ZFP57	0	1.4	2.65	0.0438	1
CNTF	0.43	0.78	1.27	0.0439	1
ARHGAP5	3.93	3.37	-1.48	0.0439	1
ZNF256	3.93	3.5	-1.35	0.0443	1
SPAG4	2.58	2.2	-1.3	0.0447	1
MT1L	0.73	0.25	-1.39	0.0449	1
PLXNB2	6.51	6.16	-1.28	0.045	1
C10orf131	2.73	3.2	1.39	0.0457	1
ZNF883	1.41	1.02	-1.32	0.0458	1
HOXB2	0.08	0.43	1.27	0.0459	1
EHD3	0.53	1.03	1.41	0.0461	1
SEMA4A	5.21	4.77	-1.35	0.0465	1
PLA2G2D	1.09	0.68	-1.33	0.0467	1
HIST1H4L	6.41	5.93	-1.39	0.0472	1
HLA-G	1.42	0.24	-2.25	0.0473	1
RARG	1.32	0.94	-1.3	0.0474	1
BCL7A	3.25	3.73	1.39	0.0475	1
TMEM52B	2	0.85	-2.21	0.0476	1
LUZP1	4.37	4.71	1.26	0.0477	1
C5orf30	2.67	2.35	-1.25	0.0477	1
ASPRV1	1.4	1.05	-1.28	0.0477	1
B4GALT1	7.36	6.99	-1.29	0.0479	1
BLNK	4.97	4.62	-1.28	0.0479	1
TMEM60	6.1	5.73	-1.3	0.0481	1
HECTD2	0.77	0.31	-1.38	0.0483	1
C4orf36	2.12	1.75	-1.29	0.0483	1
ZNF323	1.14	1.54	1.32	0.0484	1
DUSP23	2.08	1.75	-1.26	0.0485	1
C20orf132	0.78	0.44	-1.27	0.0491	1
DLGAP1-AS1	1.58	1.24	-1.26	0.0491	1
L1CAM	0.34	0.79	1.37	0.0493	1
TJP2	4.56	4.2	-1.29	0.05	1

## Sheet: Up
ID	DMSO: Control Avg (log2)	DMSO: PPD Avg (log2)	Fold Change	P-val	FDR P-val
HLA-DRB1	2.8	11.46	404.54	0.014	1
OR2T5	0	1.55	2.92	0.0434	1
ICOS	0.1	1.51	2.66	0.0022	1
ZFP57	0	1.4	2.65	0.0438	1
TNFRSF9	3.85	5.11	2.39	0.0037	1
EDARADD	0.7	1.95	2.37	0.0003	0.8248
MGC12916	1.11	2.34	2.36	0.0354	1
NPNT	0.89	2.08	2.27	0.001	1
LOC648809	1.22	2.33	2.16	0.0173	1
ADCY1	0.78	1.89	2.15	0.0075	1
UBASH3B	2.44	3.45	2.02	0.027	1
DOCK4	1.52	2.35	1.79	0.0133	1
EMR2	1.15	1.94	1.72	0.0214	1
NME8	1.68	2.43	1.68	0.0334	1
GATA3	1.9	2.64	1.67	0.0144	1
HSPA7	3.53	4.27	1.67	0.033	1
DEC1	0	0.65	1.57	0.0078	1
DDTL	1.26	1.92	1.57	0.0222	1
CDKN2C	4.41	5.04	1.56	0.0094	1
FEZ1	5.92	6.55	1.55	0.0267	1
TUBB2A	2.42	3.03	1.53	0.0196	1
WNT2	1.16	1.77	1.52	0.0162	1
NCS1	0.4	0.98	1.5	0.0083	1
KCNH3	0.37	0.93	1.48	0.0263	1
PCNT	4.77	5.33	1.47	0.034	1
LOC399744	2.13	2.69	1.47	0.0391	1
PDGFRL	0.84	1.36	1.43	0.0403	1
DEGS2	0.08	0.59	1.42	0.0025	1
ENTPD1	4.51	5.02	1.42	0.0029	1
GPC2	1.39	1.89	1.42	0.0172	1
PACS2	1.01	1.52	1.42	0.036	1
HS3ST3A1	0	0.49	1.41	0.014	1
BANK1	1.89	2.38	1.41	0.0231	1
MYEOV2	0.96	1.45	1.41	0.0289	1
PARP15	6.58	7.07	1.41	0.0419	1
EHD3	0.53	1.03	1.41	0.0461	1
LRRC70	0.84	1.33	1.4	0.0145	1
TP53BP2	2.96	3.44	1.39	0.0021	1
HCG4	0.5	0.97	1.39	0.0073	1
AAK1	1.17	1.65	1.39	0.0246	1
STK32C	0.66	1.14	1.39	0.0286	1
C10orf131	2.73	3.2	1.39	0.0457	1
BCL7A	3.25	3.73	1.39	0.0475	1
L3MBTL4	3.66	4.12	1.38	0.0112	1
JPH4	1.3	1.76	1.38	0.0261	1
GHDC	2.07	2.54	1.38	0.0336	1
MPC1	5.7	6.16	1.37	0.0178	1
ZNF561	2.81	3.26	1.37	0.0195	1
TMEM132A	1.33	1.78	1.37	0.0346	1
L1CAM	0.34	0.79	1.37	0.0493	1
CKLF	0.07	0.51	1.36	0.0074	1
CREB5	2.13	2.58	1.36	0.0211	1
MLF1	2.37	2.82	1.36	0.0235	1
CCDC146	4.64	5.08	1.35	0.0198	1
IGSF3	2.78	3.21	1.35	0.0416	1
SIGLEC14	0.55	0.98	1.35	0.042	1
ATG10	3.31	3.73	1.34	0.0273	1
MS4A14	1.19	1.6	1.34	0.0334	1
ACAA1	3.72	4.14	1.33	0.006	1
SMPD1	1.53	1.95	1.33	0.0104	1
ZCWPW1	2.83	3.24	1.33	0.0223	1
IRGQ	1.57	1.98	1.33	0.0303	1
ANKRD31	0	0.4	1.32	0.002	1
PEX19	1.85	2.24	1.32	0.0125	1
RPS3A	12.35	12.75	1.32	0.0357	1
ZNF323	1.14	1.54	1.32	0.0484	1
CIDECP	3.05	3.43	1.31	0.0034	1
ACTL7A	0	0.39	1.31	0.0086	1
FLJ42627	4.44	4.82	1.31	0.0313	1
COL7A1	2.05	2.43	1.31	0.0362	1
RAMP2	0.98	1.37	1.31	0.0364	1
APOE	1.29	1.67	1.3	0.0159	1
REEP1	0.17	0.56	1.3	0.0253	1
EPB41L1	0	0.38	1.3	0.031	1
KCNMB1	0.58	0.95	1.3	0.036	1
ZNF385C	0.63	1	1.3	0.0386	1
CD80	8.63	8.99	1.29	0.0039	1
PER3	0.4	0.77	1.29	0.0086	1
HARBI1	2.97	3.34	1.29	0.012	1
MAST4	0	0.37	1.29	0.0166	1
TOMM5	0.25	0.61	1.29	0.0209	1
ZBTB37	2.68	3.05	1.29	0.0404	1
ATHL1	7.07	7.42	1.27	0.0173	1
KRBA2	1.71	2.05	1.27	0.0274	1
FAM108B1	0.82	1.17	1.27	0.0385	1
CNTF	0.43	0.78	1.27	0.0439	1
HOXB2	0.08	0.43	1.27	0.0459	1
CDC37L1	4.52	4.86	1.26	0.0083	1
PIP5K1A	2.06	2.39	1.26	0.026	1
LRRC40	6.1	6.43	1.26	0.0309	1
GRAMD2	0	0.34	1.26	0.0369	1
LUZP1	4.37	4.71	1.26	0.0477	1
SFXN4	4.88	5.21	1.25	0.0295	1

## Sheet: Down
ID	DMSO: Control Avg (log2)	DMSO: PPD Avg (log2)	Fold Change	P-val	FDR P-val
LOC391322	2.4	0	-5.26	0.0032	1
GSTT1	2.03	0	-4.07	0.0001	0.6513
BMP8B	3.71	2.47	-2.36	0.0043	1
HLA-G	1.42	0.24	-2.25	0.0473	1
TMEM52B	2	0.85	-2.21	0.0476	1
NUGGC	4.49	3.38	-2.16	0.0013	1
ZNF300	1.43	0.35	-2.12	0.0028	1
CORO2A	2.41	1.44	-1.95	0.004	1
GUCY1A3	2.67	1.72	-1.93	0.0069	1
RGAG4	1.26	0.37	-1.85	0.0249	1
IL1B	3.72	2.83	-1.85	0.0298	1
IMPACT	3.74	2.85	-1.85	0.0401	1
CPEB1	2.22	1.33	-1.85	0.0405	1
NLRP1	3.87	3.01	-1.82	0.0085	1
PDGFRB	2.12	1.27	-1.81	0.0069	1
C10orf10	3.92	3.11	-1.75	0.0127	1
PADI2	3.22	2.44	-1.71	0.0179	1
PLOD2	3.63	2.86	-1.71	0.0357	1
LOC284889	0.94	0.19	-1.68	0.0093	1
TNS3	3.96	3.22	-1.67	0.0141	1
NEO1	1.14	0.39	-1.67	0.016	1
AIM2	4.83	4.11	-1.65	0.0119	1
SH2B2	5.86	5.15	-1.64	0.0048	1
HSD3B7	2.11	1.39	-1.64	0.0184	1
ZNF826P	3.21	2.51	-1.63	0.0407	1
PLTP	1.98	1.3	-1.61	0.0005	0.9741
MEI1	1.46	0.78	-1.61	0.0041	1
PRSS30P	1.32	0.64	-1.6	0.0165	1
FRG1B	4.35	3.67	-1.6	0.0178	1
DPEP2	2.85	2.18	-1.6	0.0228	1
ITGAL	6.43	5.77	-1.58	0.0437	1
CAMKK2	3.31	2.65	-1.57	0.0088	1
COQ2	3.64	2.98	-1.57	0.0276	1
GBP3	2.28	1.63	-1.56	0.0283	1
IL18	1.12	0.48	-1.55	0.0235	1
PILRA	5.1	4.47	-1.54	0.022	1
WNK3	1.01	0.39	-1.54	0.0273	1
ZDHHC14	2.68	2.06	-1.54	0.0375	1
SLC16A6	2.7	2.09	-1.53	0.0002	0.7672
ILDR1	3.59	2.98	-1.53	0.0039	1
CA2	4.29	3.68	-1.53	0.0332	1
JUNB	7.67	7.07	-1.52	0.0097	1
HOMER2	0.6	0	-1.52	0.0357	1
EHHADH	2.21	1.62	-1.51	0.0005	0.9741
SUB1	9.47	8.88	-1.51	0.0181	1
C16orf54	3.72	3.14	-1.5	0.0022	1
BTG2	7.94	7.36	-1.5	0.0079	1
ETV7	1.36	0.77	-1.5	0.0099	1
MYCBPAP	1.07	0.48	-1.5	0.03	1
SLC17A9	2.82	2.24	-1.5	0.0356	1
LOXL2	1.24	0.67	-1.49	0.0007	1
LOC641367	1.99	1.42	-1.49	0.0192	1
JMJD7	1.63	1.06	-1.49	0.0288	1
CELSR3	2.6	2.03	-1.48	0.0139	1
RRAS	2.41	1.84	-1.48	0.0155	1
GABRR2	2.65	2.08	-1.48	0.0347	1
ARHGAP5	3.93	3.37	-1.48	0.0439	1
LHFPL2	5.21	4.66	-1.47	0.0063	1
HIVEP2	4.73	4.17	-1.47	0.0135	1
C11orf35	4.09	3.54	-1.46	0.0064	1
PPIG	7.09	6.55	-1.45	0.0182	1
TLR9	3.63	3.1	-1.45	0.0301	1
TMEM106B	4.1	3.58	-1.44	0.0015	1
CENPM	2.52	1.99	-1.44	0.0196	1
NBPF3	1.36	0.84	-1.43	0.0396	1
CDCA7L	4.05	3.54	-1.42	0.0011	1
DUSP2	9.33	8.82	-1.42	0.0135	1
WDR25	1.01	0.51	-1.42	0.0164	1
NCOR1	4.47	3.96	-1.42	0.0169	1
GALNS	2.44	1.94	-1.42	0.0182	1
ZNF790	1.42	0.9	-1.42	0.0202	1
KRBA1	1.86	1.35	-1.42	0.0327	1
TBX6	2.81	2.32	-1.41	0.0002	0.7672
STRADB	4.48	3.99	-1.41	0.003	1
MANEAL	1.72	1.23	-1.41	0.0204	1
CKAP4	3.73	3.23	-1.41	0.0293	1
RFC5	2.72	2.22	-1.41	0.0298	1
TOP3A	4.05	3.56	-1.4	0.004	1
RPL23AP32	0.97	0.49	-1.4	0.0269	1
SPIB	5.28	4.79	-1.4	0.0336	1
ZNF792	3.51	3.04	-1.39	0.0015	1
FLJ33630	2.66	2.18	-1.39	0.0029	1
NCAPH	2.64	2.17	-1.39	0.0047	1
TXNDC11	4.34	3.86	-1.39	0.0194	1
PFKP	4.53	4.06	-1.39	0.025	1
DUSP10	5.48	5	-1.39	0.0291	1
MT1L	0.73	0.25	-1.39	0.0449	1
HIST1H4L	6.41	5.93	-1.39	0.0472	1
EXOG	2.17	1.71	-1.38	0.0006	1
ALG13	5.01	4.55	-1.38	0.0089	1
RNF208	2.67	2.2	-1.38	0.0094	1
FAAH	1.48	1.02	-1.38	0.014	1
MFGE8	0.66	0.2	-1.38	0.015	1
SGMS1	7.03	6.56	-1.38	0.0213	1
TNRC6A	3.33	2.86	-1.38	0.0266	1
ITPRIPL2	2.63	2.16	-1.38	0.0311	1
METTL21B	2.13	1.67	-1.38	0.036	1
HECTD2	0.77	0.31	-1.38	0.0483	1
SCAMP1	3	2.55	-1.37	0.0049	1
FANCI	3.44	2.98	-1.37	0.0091	1
AKAP8	6.06	5.61	-1.37	0.0166	1
TOB2	4.41	3.95	-1.37	0.0177	1
SH3PXD2A	5.78	5.32	-1.37	0.0228	1
KIAA0895L	4.5	4.04	-1.37	0.0246	1
ZNF566	1.94	1.49	-1.36	0.0039	1
PLCL2	5.56	5.11	-1.36	0.0056	1
WNT10A	7.2	6.75	-1.36	0.018	1
LOC100129534	0.68	0.24	-1.36	0.0245	1
TESK1	2.66	2.22	-1.36	0.0346	1
PKIG	1.36	0.92	-1.36	0.0346	1
SMAD3	5.85	5.42	-1.35	0.0111	1
NHSL2	0.43	0	-1.35	0.0117	1
LOC728752	1.48	1.05	-1.35	0.0228	1
C9orf172	1.8	1.37	-1.35	0.0336	1
PRX	0.69	0.25	-1.35	0.0395	1
TP73	2.47	2.04	-1.35	0.043	1
ZNF256	3.93	3.5	-1.35	0.0443	1
SEMA4A	5.21	4.77	-1.35	0.0465	1
ZNF229	0.94	0.51	-1.34	0.0033	1
ATP13A1	5.5	5.09	-1.34	0.0033	1
ZNF395	7.36	6.94	-1.34	0.0056	1
MED15	4.24	3.82	-1.34	0.0118	1
MIER2	4.09	3.66	-1.34	0.0141	1
HIST1H4F	6.88	6.47	-1.34	0.0183	1
TMEM79	1.87	1.45	-1.34	0.0195	1
EGR1	6.67	6.25	-1.34	0.0381	1
TMEM91	0.68	0.27	-1.33	0.0074	1
FRK	3.66	3.25	-1.33	0.0201	1
PTPN13	2.26	1.85	-1.33	0.0209	1
ZNF12	3.46	3.05	-1.33	0.0273	1
GCSAM	7.16	6.75	-1.33	0.0286	1
PLA2G2D	1.09	0.68	-1.33	0.0467	1
ZNF660	0.69	0.28	-1.32	0.0042	1
INSIG1	4.33	3.92	-1.32	0.0168	1
OTUB2	1	0.6	-1.32	0.0217	1
GPT	1.3	0.91	-1.32	0.0269	1
ZNF883	1.41	1.02	-1.32	0.0458	1
DDT	5.95	5.56	-1.31	0.0134	1
C9orf129	0.74	0.35	-1.31	0.0134	1
LINC00235	0.59	0.2	-1.31	0.0176	1
ZNF343	1.12	0.73	-1.31	0.0402	1
CDNF	1.25	0.87	-1.3	0.0049	1
C9orf85	3.23	2.85	-1.3	0.0053	1
KDELR3	1.68	1.3	-1.3	0.0129	1
TPI1P3	3.21	2.83	-1.3	0.0169	1
P4HA1	6.48	6.1	-1.3	0.0188	1
RAB30	4.21	3.82	-1.3	0.0332	1
TMEM18	6.64	6.26	-1.3	0.0354	1
ZFP36L1	6.87	6.5	-1.3	0.0361	1
SPAG4	2.58	2.2	-1.3	0.0447	1
RARG	1.32	0.94	-1.3	0.0474	1
TMEM60	6.1	5.73	-1.3	0.0481	1
C5orf15	6.31	5.94	-1.29	0.0001	0.6513
LOC100133091	2.14	1.77	-1.29	0.0094	1
NPPA	0.84	0.47	-1.29	0.012	1
SLC2A8	0.8	0.43	-1.29	0.0139	1
CYSTM1	5.87	5.51	-1.29	0.0166	1
SNAP47	2.59	2.22	-1.29	0.0247	1
C19orf80	0.8	0.44	-1.29	0.0252	1
ZC3H12D	5.82	5.45	-1.29	0.0382	1
PLEKHH3	2.82	2.45	-1.29	0.0393	1
TMEM242	3.97	3.6	-1.29	0.0404	1
DRAP1	8.85	8.48	-1.29	0.0405	1
B4GALT1	7.36	6.99	-1.29	0.0479	1
C4orf36	2.12	1.75	-1.29	0.0483	1
TJP2	4.56	4.2	-1.29	0.05	1
SGSM3	1.96	1.6	-1.28	0.0122	1
AURKC	0.66	0.31	-1.28	0.0196	1
C2orf81	0.86	0.5	-1.28	0.0211	1
ARL13B	1.69	1.33	-1.28	0.0287	1
PTK6	1.02	0.67	-1.28	0.0399	1
PLXNB2	6.51	6.16	-1.28	0.045	1
ASPRV1	1.4	1.05	-1.28	0.0477	1
BLNK	4.97	4.62	-1.28	0.0479	1
PQLC3	3.41	3.06	-1.27	0.0014	1
TAZ	2.8	2.46	-1.27	0.0098	1
VOPP1	4.48	4.13	-1.27	0.0101	1
TRERF1	5.4	5.06	-1.27	0.0124	1
SMAD7	5.18	4.84	-1.27	0.0203	1
ZC3H6	5.4	5.06	-1.27	0.0228	1
C2orf72	0.52	0.17	-1.27	0.0251	1
BCAS4	3.77	3.43	-1.27	0.027	1
BAIAP3	0.34	0	-1.27	0.0294	1
FBXO46	3.61	3.27	-1.27	0.0316	1
WHAMMP2	2.88	2.54	-1.27	0.0369	1
ZNF324B	4.06	3.71	-1.27	0.0372	1
DCLRE1B	4.29	3.95	-1.27	0.0392	1
C20orf132	0.78	0.44	-1.27	0.0491	1
PPP1R36	0.33	0	-1.26	0.0025	1
LPIN2	6.53	6.2	-1.26	0.0067	1
SERTAD3	4.78	4.44	-1.26	0.0097	1
TMEM66	6.85	6.52	-1.26	0.0135	1
IRF7	6.23	5.9	-1.26	0.0228	1
APCDD1	0.56	0.22	-1.26	0.0398	1
ENO3	3.18	2.86	-1.26	0.0404	1
RNF148	0.34	0	-1.26	0.0414	1
ZBTB33	5.97	5.64	-1.26	0.0436	1
DUSP23	2.08	1.75	-1.26	0.0485	1
DLGAP1-AS1	1.58	1.24	-1.26	0.0491	1
MYO1E	8.8	8.48	-1.25	0.0011	1
LEMD3	5.41	5.08	-1.25	0.0112	1
LSM6	4.21	3.89	-1.25	0.035	1
LOC100506083	2.14	1.82	-1.25	0.0365	1
C5orf30	2.67	2.35	-1.25	0.0477	1
