# Supplementary material for: Divergent Transcriptomic Effects of Allopregnanolone in Postpartum Depression
Source: Genes (Basel). 2023 Jun 8;14(6):1234. doi: 10.3390/genes14061234 (PMC10298697; doi:10.3390/genes14061234)
Supplement: Supplementary file 1 [file genes-14-01234-s001.zip › TableS2_Allo_PPDvControl.xlsx]

## Sheet: Allo_PPDvControl
ID	Allo: Control Avg (log2)	Allo: PPD Avg (log2)	Fold Change	P-val	FDR P-val
GSTT1	2.01	0	-4.01	2.31e-05	0.4746
PLEKHG4	0.55	0.16	-1.31	0.0002	1
PQLC3	3.38	2.99	-1.32	0.0002	1
EMB	1.93	3.26	2.51	0.0004	1
ADCY9	0.36	1.59	2.35	0.0005	1
CDCA7L	4.05	3.58	-1.39	0.0006	1
ENTPD1	4.49	5.11	1.55	0.0006	1
EDARADD	0.49	1.74	2.37	0.0007	1
OR56B1	2.09	2.99	1.87	0.0008	1
SOWAHA	0	0.46	1.37	0.0008	1
PLTP	1.85	1.22	-1.55	0.0011	1
ATHL1	6.97	7.45	1.4	0.0011	1
NT5DC1	6.62	6.3	-1.25	0.0014	1
UGGT2	3.41	4.04	1.55	0.0015	1
ZBTB46	1.86	2.32	1.37	0.0016	1
LYSMD2	3.2	3.6	1.32	0.0017	1
NPNT	1.11	2.13	2.03	0.0022	1
TP53BP2	3.04	3.45	1.32	0.0024	1
CHD3	5.59	5.93	1.27	0.0024	1
DUSP10	5.69	5.15	-1.45	0.0028	1
SIGLEC5	0.39	1.37	1.97	0.0029	1
LOC391322	2.35	0.04	-4.96	0.0031	1
DDTL	0.8	1.74	1.92	0.0031	1
FLJ42627	4.53	5.02	1.41	0.0033	1
OR51B5	0	0.36	1.28	0.0037	1
RBPJ	5.18	4.77	-1.33	0.0037	1
TNFRSF9	3.69	5	2.49	0.0039	1
NLRC3	3.34	3.71	1.29	0.0039	1
ANKH	2.78	3.77	1.99	0.004	1
WDR66	0.46	0	-1.37	0.0041	1
TOP1MT	4.35	3.9	-1.37	0.0041	1
RASGRF2	1.06	0.29	-1.71	0.0041	1
NUGGC	4.68	3.42	-2.39	0.0042	1
AK1	3.93	3.54	-1.31	0.0048	1
CREB5	1.63	2.59	1.96	0.0049	1
NACAD	0	0.34	1.26	0.005	1
ARHGAP10	7.76	7.39	-1.29	0.0051	1
IRF4	8.54	8.16	-1.3	0.0052	1
ISPD	0.46	0	-1.38	0.0054	1
ADAM8	4.02	4.45	1.35	0.0057	1
L3MBTL4	3.55	3.98	1.35	0.006	1
TMEM132A	1.21	1.83	1.54	0.0065	1
NOL3	1.13	0.57	-1.47	0.0066	1
FLJ23867	1.31	1.92	1.53	0.0079	1
MMP17	0.72	0	-1.65	0.008	1
XRCC6	0	0.39	1.31	0.008	1
IMPACT	3.62	2.96	-1.58	0.0083	1
FRG1B	4.44	3.77	-1.59	0.0083	1
TBC1D7	2.82	2.5	-1.25	0.0087	1
STRADB	4.38	3.94	-1.36	0.0087	1
MATK	0.32	0.72	1.32	0.0088	1
CETN2	4.78	5.19	1.33	0.0088	1
VEGFA	4.46	4.1	-1.28	0.0089	1
OTUB2	1.06	0.45	-1.53	0.0092	1
MAFB	0.66	0.13	-1.45	0.0095	1
SLC35G5	1.57	1.93	1.29	0.0095	1
TMEM56	0.64	0.21	-1.35	0.0095	1
HLA-DRB1	2.48	11.29	446.96	0.0099	1
EMR2	1.02	2.27	2.38	0.0099	1
PLOD2	3.75	2.31	-2.7	0.0099	1
SLC4A8	1.86	2.24	1.3	0.0101	1
GHRLOS2	4.35	4.71	1.28	0.0106	1
LOC284889	0.88	0	-1.84	0.0106	1
SIGLEC14	0.41	0.82	1.33	0.0107	1
NLGN3	2.05	1.7	-1.28	0.0109	1
NUDT9	4.53	4.18	-1.27	0.011	1
STK32C	0.91	1.43	1.42	0.0115	1
CX3CL1	0.34	1.16	1.76	0.0118	1
ICOS	0.19	1.27	2.12	0.0119	1
RASA2	3.1	2.64	-1.37	0.0121	1
DOCK4	1.53	2.4	1.82	0.0125	1
PLCL2	5.45	5	-1.37	0.0125	1
C9orf129	0.77	0.44	-1.25	0.0125	1
MYL6B	0.78	1.29	1.42	0.0129	1
CACFD1	0.85	1.35	1.42	0.013	1
APBB1	0.72	1.16	1.36	0.013	1
ZNF395	7.24	6.84	-1.32	0.0134	1
BMP8B	3.64	2.65	-1.99	0.0134	1
ENTPD4	4.82	4.45	-1.29	0.0135	1
PDGFRB	1.76	1.11	-1.58	0.0135	1
ZNF98	0.49	0.94	1.37	0.0138	1
ADAMDEC1	0.18	0.59	1.33	0.014	1
ADCY1	0.71	1.74	2.04	0.014	1
LHFPL2	5.13	4.6	-1.45	0.0142	1
DSCR9	1.81	1.47	-1.26	0.0142	1
GBGT1	0.77	1.11	1.27	0.0143	1
C16orf54	3.53	3.18	-1.28	0.0144	1
ZNF691	0.46	0.85	1.31	0.0144	1
TLR6	4.75	4.07	-1.6	0.0148	1
CORO2A	2.33	1.57	-1.7	0.0149	1
LOC100128398	2.24	1.73	-1.42	0.015	1
GJA1	1.79	2.5	1.64	0.0154	1
FOXC1	0.53	0.18	-1.27	0.0156	1
FEZ1	5.89	6.59	1.62	0.0157	1
NKAPP1	2.03	2.38	1.27	0.0161	1
PDLIM3	0	0.35	1.28	0.0162	1
GATA3	2.07	2.78	1.64	0.0162	1
ZFP36	8.65	8.31	-1.26	0.0164	1
JPH4	1.27	1.65	1.29	0.0168	1
CREBBP	6.44	6.07	-1.29	0.0171	1
2022-09-15	6.92	6.5	-1.34	0.0172	1
FDPS	4.48	4.87	1.31	0.0173	1
LOC100506054	1.19	1.55	1.28	0.0177	1
OR13A1	0	0.38	1.3	0.0178	1
PACSIN2	4.04	4.6	1.47	0.0179	1
C10orf10	4.22	3.38	-1.78	0.0179	1
C15orf27	0.23	1.07	1.79	0.0183	1
ZBED2	0.23	0.71	1.39	0.0183	1
FAM114A2	4.26	3.76	-1.41	0.0185	1
GPR56	0.78	0.45	-1.26	0.0186	1
ZNF300	1.24	0.43	-1.75	0.019	1
IL9R	1.22	2.54	2.5	0.019	1
LOC648809	1.18	2.25	2.11	0.019	1
AQP7P1	0.95	0.18	-1.71	0.0195	1
GAD1	1.71	0.48	-2.35	0.0199	1
MICALL2	0.8	0.35	-1.36	0.02	1
PSMD2	0.51	0.84	1.25	0.02	1
RBM47	6.86	6.52	-1.26	0.0202	1
TTC27	1.69	2.16	1.39	0.0202	1
SPTY2D1	6.03	5.54	-1.4	0.0206	1
MPC1	5.75	6.13	1.3	0.0207	1
RGS10	6.92	7.25	1.26	0.0209	1
C16orf95	0.32	0.81	1.41	0.021	1
CRELD2	4.7	4.22	-1.4	0.0212	1
HBA2	1	0.62	-1.3	0.0221	1
SPDYE6	2.13	2.75	1.54	0.0223	1
CCL3L3	4.47	3.85	-1.54	0.0224	1
ARHGAP42	3.41	2.82	-1.5	0.0224	1
CCM2	3.12	3.48	1.28	0.023	1
LINC00167	2.33	2	-1.26	0.0232	1
RNASE6	5.24	5.71	1.39	0.0232	1
DNAH17	1.66	2.84	2.25	0.0233	1
LOC148696	5.97	5.5	-1.38	0.0237	1
MBNL3	2.4	2.87	1.39	0.0237	1
NPTN	0.83	0.49	-1.27	0.0239	1
TTLL1	2.87	3.27	1.32	0.024	1
FRK	3.32	2.93	-1.31	0.0242	1
PIK3R5	3.42	2.91	-1.42	0.0242	1
PPP1R9A	0.73	0.17	-1.48	0.0243	1
JHDM1D	5.28	4.18	-2.15	0.0243	1
WWC3	4.66	5.07	1.33	0.0245	1
OMA1	6.22	5.87	-1.28	0.0245	1
TARSL2	6.46	6.04	-1.34	0.0246	1
HEXDC	3.44	3.05	-1.31	0.0247	1
LSS	1.18	1.58	1.32	0.0248	1
C7orf61	0.81	1.35	1.45	0.0249	1
LY86	6.91	7.54	1.56	0.0254	1
SLAIN1	5.99	6.43	1.35	0.0257	1
ZNF229	0.93	0.54	-1.31	0.0258	1
DNM1	0.19	0.67	1.39	0.0258	1
INTU	1.34	0.83	-1.42	0.0262	1
LOC400680	0.78	0.24	-1.46	0.0264	1
CEMP1	2.05	1.63	-1.33	0.0265	1
NME8	1.22	2.44	2.33	0.0267	1
MT2A	6.21	5.38	-1.78	0.0268	1
PADI2	2.78	2.19	-1.5	0.0274	1
ID2	3.34	2.95	-1.31	0.0276	1
CYP4V2	2.15	2.91	1.69	0.0277	1
LOC643723	0.61	0.2	-1.33	0.028	1
GAL3ST4	2.01	2.37	1.29	0.0287	1
ZNF584	2.49	2.84	1.27	0.0287	1
TTC18	1.38	1.85	1.38	0.029	1
SERPINI1	2.94	2.44	-1.42	0.0293	1
GSTM2	2.23	3	1.71	0.0295	1
MED15	4.22	3.83	-1.31	0.0301	1
NUDT8	1.64	1.28	-1.28	0.0302	1
CCDC6	6.41	6.78	1.29	0.0303	1
SCARNA3	5.31	6.05	1.67	0.0307	1
CCR4	0.56	1.23	1.59	0.0307	1
DPEP2	2.97	2.28	-1.61	0.0309	1
LCA5	3.69	3.23	-1.38	0.031	1
POMZP3	3	4	2	0.0311	1
HSD3B7	1.81	1.43	-1.3	0.0311	1
HS6ST1	1.88	1.33	-1.47	0.0313	1
AASS	2.63	1.56	-2.09	0.0313	1
PLAUR	2.2	2.58	1.31	0.0315	1
E2F6	2.46	2.13	-1.26	0.0315	1
OXR1	4.49	4.01	-1.39	0.0316	1
SUGT1	3.89	3.54	-1.28	0.0318	1
P4HA1	6.15	5.56	-1.5	0.0321	1
STX3	0.09	0.55	1.37	0.0321	1
PRICKLE4	0.77	0.38	-1.31	0.0322	1
EHHADH	1.93	1.54	-1.31	0.0322	1
DAB2IP	0.08	0.52	1.36	0.0323	1
PPEF1	0.54	1.04	1.42	0.0324	1
MAN2C1	1.74	2.14	1.32	0.033	1
PTPN13	2.16	1.83	-1.26	0.0331	1
LPGAT1	5.74	5.26	-1.4	0.0332	1
PSTPIP1	1.35	0.76	-1.5	0.0333	1
ACOXL	2.8	3.61	1.75	0.0333	1
CLTA	0.94	1.26	1.25	0.0337	1
NBEA	2.02	1.3	-1.64	0.0338	1
ADD2	0	0.35	1.28	0.0338	1
PCDHGA11	0.54	0.86	1.25	0.0347	1
BEX4	2.57	1.95	-1.53	0.0349	1
KCNQ5	3.08	2.44	-1.55	0.0353	1
CUL7	4.54	4.21	-1.26	0.0354	1
OR9A2	0.84	1.93	2.12	0.0355	1
CLN8	5.54	5.2	-1.27	0.0357	1
LOC100499194	1.28	1.65	1.29	0.0357	1
TSPAN12	4.27	3.85	-1.34	0.0357	1
LRG1	1.56	0.59	-1.96	0.0358	1
GRASP	1.88	2.53	1.56	0.0361	1
AKAP13	4.06	3.72	-1.26	0.0363	1
GJA3	1.11	0.64	-1.39	0.0365	1
ENO3	3.3	2.95	-1.27	0.0365	1
COL4A2	0.3	1.12	1.76	0.0365	1
GADD45G	3.34	2.64	-1.62	0.0366	1
PCCA	2.62	3	1.3	0.0369	1
PIM2	9.04	8.6	-1.35	0.0373	1
ADM	2.27	1.28	-1.99	0.0375	1
PCDHB9	1.33	0.9	-1.35	0.0375	1
TMEM242	3.9	3.53	-1.29	0.0381	1
CA2	4.34	3.65	-1.62	0.0384	1
ZNF492	1.89	2.74	1.8	0.0388	1
CTBP1	6.54	5.96	-1.49	0.039	1
UBASH3B	2.54	3.61	2.1	0.0391	1
NMRAL1	2.66	3.07	1.33	0.0395	1
GTF2B	2.54	2.2	-1.27	0.0396	1
ZNF280B	1.86	2.22	1.28	0.0397	1
CTSL2	0.63	0.29	-1.27	0.0401	1
WNT2	0.98	1.45	1.39	0.0403	1
FKBP9	2.43	3.15	1.65	0.0411	1
PPIEL	0.22	0.59	1.29	0.0411	1
CPEB3	2.18	1.49	-1.61	0.0413	1
TET1	1.9	2.49	1.5	0.0415	1
ETV7	1.32	0.72	-1.52	0.0418	1
CNNM1	1.63	1.2	-1.34	0.0419	1
DRAP1	8.82	8.49	-1.26	0.0421	1
LILRB1	3.38	3.94	1.48	0.0425	1
IFT122	1.51	1.86	1.27	0.0427	1
EHD3	0.24	0.64	1.32	0.0429	1
TACSTD2	0.46	0.9	1.35	0.043	1
LOC100499489	1.26	1.59	1.25	0.0431	1
CACNA2D4	0.75	0.24	-1.42	0.0431	1
ZC3H12D	5.72	5.25	-1.39	0.0433	1
FKSG29	3.49	3.05	-1.36	0.0435	1
S1PR1	4.63	4.09	-1.45	0.0436	1
PSKH1	3.36	3.7	1.27	0.0438	1
SNORA47	3.01	3.43	1.33	0.044	1
ARG2	3.12	2.06	-2.08	0.044	1
UNC13B	3.83	2.45	-2.6	0.0444	1
LOC100128176	0.72	1.18	1.38	0.0444	1
LOC100131067	0.36	0.72	1.28	0.0446	1
LOC284009	0.77	1.2	1.35	0.0448	1
PKIG	1.4	0.97	-1.35	0.0449	1
GIMAP6	2.5	3.14	1.56	0.045	1
TTC12	1.29	1.71	1.34	0.0451	1
BRPF3	4.96	4.62	-1.27	0.0458	1
PDGFRL	0.85	1.3	1.36	0.0462	1
SCAMP1	3.02	2.65	-1.29	0.0463	1
CCND1	3.45	4.52	2.1	0.0467	1
C21orf58	1.08	1.5	1.34	0.0468	1
CCL25	1.61	1.16	-1.36	0.0468	1
CPEB1	2.19	1.51	-1.6	0.0481	1
WNK3	0.85	0.48	-1.29	0.0483	1
FOXO1	5.2	4.39	-1.76	0.0484	1
BEND3	2.52	2.95	1.34	0.0485	1
PSAP	7.43	7.78	1.28	0.0486	1
MYH11	0.18	0.8	1.54	0.0488	1
PCED1B	1.36	0.86	-1.41	0.0489	1
GIMAP7	1.81	3.01	2.28	0.0489	1
AIM2	4.59	4.03	-1.47	0.049	1
OR5C1	0.04	0.43	1.31	0.0491	1
DPH2	2.03	1.7	-1.26	0.0491	1
TMEM59L	1	0.36	-1.56	0.0494	1
GSTO2	0.3	0.66	1.29	0.0494	1
MTHFD2L	1.43	1.05	-1.3	0.0495	1
FBXO9	0.96	0.55	-1.33	0.0499	1

## Sheet: Up
ID	Allo: Control Avg (log2)	Allo: PPD Avg (log2)	Fold Change	P-val	FDR P-val
HLA-DRB1	2.48	11.29	446.96	0.0099	1
EMB	1.93	3.26	2.51	0.0004	1
IL9R	1.22	2.54	2.5	0.019	1
TNFRSF9	3.69	5	2.49	0.0039	1
EMR2	1.02	2.27	2.38	0.0099	1
EDARADD	0.49	1.74	2.37	0.0007	1
ADCY9	0.36	1.59	2.35	0.0005	1
NME8	1.22	2.44	2.33	0.0267	1
GIMAP7	1.81	3.01	2.28	0.0489	1
DNAH17	1.66	2.84	2.25	0.0233	1
ICOS	0.19	1.27	2.12	0.0119	1
OR9A2	0.84	1.93	2.12	0.0355	1
LOC648809	1.18	2.25	2.11	0.019	1
UBASH3B	2.54	3.61	2.1	0.0391	1
CCND1	3.45	4.52	2.1	0.0467	1
ADCY1	0.71	1.74	2.04	0.014	1
NPNT	1.11	2.13	2.03	0.0022	1
POMZP3	3	4	2	0.0311	1
ANKH	2.78	3.77	1.99	0.004	1
SIGLEC5	0.39	1.37	1.97	0.0029	1
CREB5	1.63	2.59	1.96	0.0049	1
DDTL	0.8	1.74	1.92	0.0031	1
OR56B1	2.09	2.99	1.87	0.0008	1
DOCK4	1.53	2.4	1.82	0.0125	1
ZNF492	1.89	2.74	1.8	0.0388	1
C15orf27	0.23	1.07	1.79	0.0183	1
CX3CL1	0.34	1.16	1.76	0.0118	1
COL4A2	0.3	1.12	1.76	0.0365	1
ACOXL	2.8	3.61	1.75	0.0333	1
GSTM2	2.23	3	1.71	0.0295	1
CYP4V2	2.15	2.91	1.69	0.0277	1
SCARNA3	5.31	6.05	1.67	0.0307	1
FKBP9	2.43	3.15	1.65	0.0411	1
GJA1	1.79	2.5	1.64	0.0154	1
GATA3	2.07	2.78	1.64	0.0162	1
FEZ1	5.89	6.59	1.62	0.0157	1
CCR4	0.56	1.23	1.59	0.0307	1
LY86	6.91	7.54	1.56	0.0254	1
GRASP	1.88	2.53	1.56	0.0361	1
GIMAP6	2.5	3.14	1.56	0.045	1
ENTPD1	4.49	5.11	1.55	0.0006	1
UGGT2	3.41	4.04	1.55	0.0015	1
TMEM132A	1.21	1.83	1.54	0.0065	1
SPDYE6	2.13	2.75	1.54	0.0223	1
MYH11	0.18	0.8	1.54	0.0488	1
FLJ23867	1.31	1.92	1.53	0.0079	1
TET1	1.9	2.49	1.5	0.0415	1
LILRB1	3.38	3.94	1.48	0.0425	1
PACSIN2	4.04	4.6	1.47	0.0179	1
C7orf61	0.81	1.35	1.45	0.0249	1
STK32C	0.91	1.43	1.42	0.0115	1
MYL6B	0.78	1.29	1.42	0.0129	1
CACFD1	0.85	1.35	1.42	0.013	1
PPEF1	0.54	1.04	1.42	0.0324	1
FLJ42627	4.53	5.02	1.41	0.0033	1
C16orf95	0.32	0.81	1.41	0.021	1
ATHL1	6.97	7.45	1.4	0.0011	1
ZBED2	0.23	0.71	1.39	0.0183	1
TTC27	1.69	2.16	1.39	0.0202	1
RNASE6	5.24	5.71	1.39	0.0232	1
MBNL3	2.4	2.87	1.39	0.0237	1
DNM1	0.19	0.67	1.39	0.0258	1
WNT2	0.98	1.45	1.39	0.0403	1
TTC18	1.38	1.85	1.38	0.029	1
LOC100128176	0.72	1.18	1.38	0.0444	1
SOWAHA	0	0.46	1.37	0.0008	1
ZBTB46	1.86	2.32	1.37	0.0016	1
ZNF98	0.49	0.94	1.37	0.0138	1
STX3	0.09	0.55	1.37	0.0321	1
APBB1	0.72	1.16	1.36	0.013	1
DAB2IP	0.08	0.52	1.36	0.0323	1
PDGFRL	0.85	1.3	1.36	0.0462	1
ADAM8	4.02	4.45	1.35	0.0057	1
L3MBTL4	3.55	3.98	1.35	0.006	1
SLAIN1	5.99	6.43	1.35	0.0257	1
TACSTD2	0.46	0.9	1.35	0.043	1
LOC284009	0.77	1.2	1.35	0.0448	1
TTC12	1.29	1.71	1.34	0.0451	1
C21orf58	1.08	1.5	1.34	0.0468	1
BEND3	2.52	2.95	1.34	0.0485	1
CETN2	4.78	5.19	1.33	0.0088	1
SIGLEC14	0.41	0.82	1.33	0.0107	1
ADAMDEC1	0.18	0.59	1.33	0.014	1
WWC3	4.66	5.07	1.33	0.0245	1
NMRAL1	2.66	3.07	1.33	0.0395	1
SNORA47	3.01	3.43	1.33	0.044	1
LYSMD2	3.2	3.6	1.32	0.0017	1
TP53BP2	3.04	3.45	1.32	0.0024	1
MATK	0.32	0.72	1.32	0.0088	1
TTLL1	2.87	3.27	1.32	0.024	1
LSS	1.18	1.58	1.32	0.0248	1
MAN2C1	1.74	2.14	1.32	0.033	1
EHD3	0.24	0.64	1.32	0.0429	1
XRCC6	0	0.39	1.31	0.008	1
ZNF691	0.46	0.85	1.31	0.0144	1
FDPS	4.48	4.87	1.31	0.0173	1
PLAUR	2.2	2.58	1.31	0.0315	1
OR5C1	0.04	0.43	1.31	0.0491	1
SLC4A8	1.86	2.24	1.3	0.0101	1
OR13A1	0	0.38	1.3	0.0178	1
MPC1	5.75	6.13	1.3	0.0207	1
PCCA	2.62	3	1.3	0.0369	1
NLRC3	3.34	3.71	1.29	0.0039	1
SLC35G5	1.57	1.93	1.29	0.0095	1
JPH4	1.27	1.65	1.29	0.0168	1
GAL3ST4	2.01	2.37	1.29	0.0287	1
CCDC6	6.41	6.78	1.29	0.0303	1
LOC100499194	1.28	1.65	1.29	0.0357	1
PPIEL	0.22	0.59	1.29	0.0411	1
GSTO2	0.3	0.66	1.29	0.0494	1
OR51B5	0	0.36	1.28	0.0037	1
GHRLOS2	4.35	4.71	1.28	0.0106	1
PDLIM3	0	0.35	1.28	0.0162	1
LOC100506054	1.19	1.55	1.28	0.0177	1
CCM2	3.12	3.48	1.28	0.023	1
ADD2	0	0.35	1.28	0.0338	1
ZNF280B	1.86	2.22	1.28	0.0397	1
LOC100131067	0.36	0.72	1.28	0.0446	1
PSAP	7.43	7.78	1.28	0.0486	1
CHD3	5.59	5.93	1.27	0.0024	1
GBGT1	0.77	1.11	1.27	0.0143	1
NKAPP1	2.03	2.38	1.27	0.0161	1
ZNF584	2.49	2.84	1.27	0.0287	1
IFT122	1.51	1.86	1.27	0.0427	1
PSKH1	3.36	3.7	1.27	0.0438	1
NACAD	0	0.34	1.26	0.005	1
RGS10	6.92	7.25	1.26	0.0209	1
PSMD2	0.51	0.84	1.25	0.02	1
CLTA	0.94	1.26	1.25	0.0337	1
PCDHGA11	0.54	0.86	1.25	0.0347	1
LOC100499489	1.26	1.59	1.25	0.0431	1

## Sheet: Down
ID	Allo: Control Avg (log2)	Allo: PPD Avg (log2)	Fold Change	P-val	FDR P-val
LOC391322	2.35	0.04	-4.96	0.0031	1
GSTT1	2.01	0	-4.01	2.31e-05	0.4746
PLOD2	3.75	2.31	-2.7	0.0099	1
UNC13B	3.83	2.45	-2.6	0.0444	1
NUGGC	4.68	3.42	-2.39	0.0042	1
GAD1	1.71	0.48	-2.35	0.0199	1
JHDM1D	5.28	4.18	-2.15	0.0243	1
AASS	2.63	1.56	-2.09	0.0313	1
ARG2	3.12	2.06	-2.08	0.044	1
BMP8B	3.64	2.65	-1.99	0.0134	1
ADM	2.27	1.28	-1.99	0.0375	1
LRG1	1.56	0.59	-1.96	0.0358	1
LOC284889	0.88	0	-1.84	0.0106	1
C10orf10	4.22	3.38	-1.78	0.0179	1
MT2A	6.21	5.38	-1.78	0.0268	1
FOXO1	5.2	4.39	-1.76	0.0484	1
ZNF300	1.24	0.43	-1.75	0.019	1
RASGRF2	1.06	0.29	-1.71	0.0041	1
AQP7P1	0.95	0.18	-1.71	0.0195	1
CORO2A	2.33	1.57	-1.7	0.0149	1
MMP17	0.72	0	-1.65	0.008	1
NBEA	2.02	1.3	-1.64	0.0338	1
GADD45G	3.34	2.64	-1.62	0.0366	1
CA2	4.34	3.65	-1.62	0.0384	1
DPEP2	2.97	2.28	-1.61	0.0309	1
CPEB3	2.18	1.49	-1.61	0.0413	1
TLR6	4.75	4.07	-1.6	0.0148	1
CPEB1	2.19	1.51	-1.6	0.0481	1
FRG1B	4.44	3.77	-1.59	0.0083	1
IMPACT	3.62	2.96	-1.58	0.0083	1
PDGFRB	1.76	1.11	-1.58	0.0135	1
TMEM59L	1	0.36	-1.56	0.0494	1
PLTP	1.85	1.22	-1.55	0.0011	1
KCNQ5	3.08	2.44	-1.55	0.0353	1
CCL3L3	4.47	3.85	-1.54	0.0224	1
OTUB2	1.06	0.45	-1.53	0.0092	1
BEX4	2.57	1.95	-1.53	0.0349	1
ETV7	1.32	0.72	-1.52	0.0418	1
ARHGAP42	3.41	2.82	-1.5	0.0224	1
PADI2	2.78	2.19	-1.5	0.0274	1
P4HA1	6.15	5.56	-1.5	0.0321	1
PSTPIP1	1.35	0.76	-1.5	0.0333	1
CTBP1	6.54	5.96	-1.49	0.039	1
PPP1R9A	0.73	0.17	-1.48	0.0243	1
NOL3	1.13	0.57	-1.47	0.0066	1
HS6ST1	1.88	1.33	-1.47	0.0313	1
AIM2	4.59	4.03	-1.47	0.049	1
LOC400680	0.78	0.24	-1.46	0.0264	1
DUSP10	5.69	5.15	-1.45	0.0028	1
MAFB	0.66	0.13	-1.45	0.0095	1
LHFPL2	5.13	4.6	-1.45	0.0142	1
S1PR1	4.63	4.09	-1.45	0.0436	1
LOC100128398	2.24	1.73	-1.42	0.015	1
PIK3R5	3.42	2.91	-1.42	0.0242	1
INTU	1.34	0.83	-1.42	0.0262	1
SERPINI1	2.94	2.44	-1.42	0.0293	1
CACNA2D4	0.75	0.24	-1.42	0.0431	1
FAM114A2	4.26	3.76	-1.41	0.0185	1
PCED1B	1.36	0.86	-1.41	0.0489	1
SPTY2D1	6.03	5.54	-1.4	0.0206	1
CRELD2	4.7	4.22	-1.4	0.0212	1
LPGAT1	5.74	5.26	-1.4	0.0332	1
CDCA7L	4.05	3.58	-1.39	0.0006	1
OXR1	4.49	4.01	-1.39	0.0316	1
GJA3	1.11	0.64	-1.39	0.0365	1
ZC3H12D	5.72	5.25	-1.39	0.0433	1
ISPD	0.46	0	-1.38	0.0054	1
LOC148696	5.97	5.5	-1.38	0.0237	1
LCA5	3.69	3.23	-1.38	0.031	1
WDR66	0.46	0	-1.37	0.0041	1
TOP1MT	4.35	3.9	-1.37	0.0041	1
RASA2	3.1	2.64	-1.37	0.0121	1
PLCL2	5.45	5	-1.37	0.0125	1
STRADB	4.38	3.94	-1.36	0.0087	1
MICALL2	0.8	0.35	-1.36	0.02	1
FKSG29	3.49	3.05	-1.36	0.0435	1
CCL25	1.61	1.16	-1.36	0.0468	1
TMEM56	0.64	0.21	-1.35	0.0095	1
PIM2	9.04	8.6	-1.35	0.0373	1
PCDHB9	1.33	0.9	-1.35	0.0375	1
PKIG	1.4	0.97	-1.35	0.0449	1
2022-09-15	6.92	6.5	-1.34	0.0172	1
TARSL2	6.46	6.04	-1.34	0.0246	1
TSPAN12	4.27	3.85	-1.34	0.0357	1
CNNM1	1.63	1.2	-1.34	0.0419	1
RBPJ	5.18	4.77	-1.33	0.0037	1
CEMP1	2.05	1.63	-1.33	0.0265	1
LOC643723	0.61	0.2	-1.33	0.028	1
FBXO9	0.96	0.55	-1.33	0.0499	1
PQLC3	3.38	2.99	-1.32	0.0002	1
ZNF395	7.24	6.84	-1.32	0.0134	1
PLEKHG4	0.55	0.16	-1.31	0.0002	1
AK1	3.93	3.54	-1.31	0.0048	1
FRK	3.32	2.93	-1.31	0.0242	1
HEXDC	3.44	3.05	-1.31	0.0247	1
ZNF229	0.93	0.54	-1.31	0.0258	1
ID2	3.34	2.95	-1.31	0.0276	1
MED15	4.22	3.83	-1.31	0.0301	1
PRICKLE4	0.77	0.38	-1.31	0.0322	1
EHHADH	1.93	1.54	-1.31	0.0322	1
IRF4	8.54	8.16	-1.3	0.0052	1
HBA2	1	0.62	-1.3	0.0221	1
HSD3B7	1.81	1.43	-1.3	0.0311	1
MTHFD2L	1.43	1.05	-1.3	0.0495	1
ARHGAP10	7.76	7.39	-1.29	0.0051	1
ENTPD4	4.82	4.45	-1.29	0.0135	1
CREBBP	6.44	6.07	-1.29	0.0171	1
TMEM242	3.9	3.53	-1.29	0.0381	1
SCAMP1	3.02	2.65	-1.29	0.0463	1
WNK3	0.85	0.48	-1.29	0.0483	1
VEGFA	4.46	4.1	-1.28	0.0089	1
NLGN3	2.05	1.7	-1.28	0.0109	1
C16orf54	3.53	3.18	-1.28	0.0144	1
OMA1	6.22	5.87	-1.28	0.0245	1
NUDT8	1.64	1.28	-1.28	0.0302	1
SUGT1	3.89	3.54	-1.28	0.0318	1
NUDT9	4.53	4.18	-1.27	0.011	1
FOXC1	0.53	0.18	-1.27	0.0156	1
NPTN	0.83	0.49	-1.27	0.0239	1
CLN8	5.54	5.2	-1.27	0.0357	1
ENO3	3.3	2.95	-1.27	0.0365	1
GTF2B	2.54	2.2	-1.27	0.0396	1
CTSL2	0.63	0.29	-1.27	0.0401	1
BRPF3	4.96	4.62	-1.27	0.0458	1
DSCR9	1.81	1.47	-1.26	0.0142	1
ZFP36	8.65	8.31	-1.26	0.0164	1
GPR56	0.78	0.45	-1.26	0.0186	1
RBM47	6.86	6.52	-1.26	0.0202	1
LINC00167	2.33	2	-1.26	0.0232	1
E2F6	2.46	2.13	-1.26	0.0315	1
PTPN13	2.16	1.83	-1.26	0.0331	1
CUL7	4.54	4.21	-1.26	0.0354	1
AKAP13	4.06	3.72	-1.26	0.0363	1
DRAP1	8.82	8.49	-1.26	0.0421	1
DPH2	2.03	1.7	-1.26	0.0491	1
NT5DC1	6.62	6.3	-1.25	0.0014	1
TBC1D7	2.82	2.5	-1.25	0.0087	1
C9orf129	0.77	0.44	-1.25	0.0125	1
