# Supplementary material for: Divergent Transcriptomic Effects of Allopregnanolone in Postpartum Depression
Source: Genes (Basel). 2023 Jun 8;14(6):1234. doi: 10.3390/genes14061234 (PMC10298697; doi:10.3390/genes14061234)
Supplement: Supplementary file 1 [file genes-14-01234-s001.zip › TableS3_Control_AllovDMSO.xlsx]

## Sheet: Control_AllovDMSO
ID	Control: DMSO Avg (log2)	Control: Allo Avg (log2)	Fold Change	P-val	FDR P-val
C1orf63	3.11	3.76	1.56	2.29e-05	0.4694
MAFB	0	0.66	1.58	6.36e-05	0.5538
EGLN2	4.12	3.66	-1.38	9e-05	0.5538
ZBTB43	4.29	4.93	1.55	0.0001	0.5538
LOC401127	0.75	1.5	1.67	0.0003	0.7173
ARC	0.09	0.59	1.42	0.0003	0.7173
SAT2	5.14	5.57	1.35	0.0003	0.7173
PGM3	4.39	4.9	1.42	0.0004	0.7173
DUSP1	5.4	6.35	1.93	0.0004	0.7173
KCNV2	0.18	0.74	1.47	0.0005	0.92
SQLE	5.52	5.05	-1.38	0.0007	0.9769
C14orf28	3.9	3.54	-1.28	0.0008	0.9769
PANK4	5.65	6	1.28	0.0008	0.9769
GMEB2	4.99	5.37	1.3	0.0009	0.9769
SWT1	1.17	1.64	1.39	0.001	0.9769
PRKAR2B	0	0.39	1.31	0.001	0.9769
ZNF790	1.42	0.93	-1.4	0.0012	0.9769
NDUFAF4P1	1.86	2.44	1.5	0.0012	0.9769
FOXC1	0	0.53	1.44	0.0012	0.9769
NCDN	2.6	2.24	-1.28	0.0013	0.9769
RSRC2	5.98	6.47	1.4	0.0013	0.9769
ZNF184	1.88	1.54	-1.26	0.0015	0.9769
COPS3	4.42	4.8	1.3	0.0015	0.9769
IFT172	4.41	4.78	1.29	0.0016	0.9769
LUC7L	5.25	5.59	1.27	0.0017	0.9769
MXD1	3.74	4.1	1.28	0.0018	0.9769
DHCR7	5.31	4.75	-1.48	0.0018	0.9769
LOC100499194	1.78	1.28	-1.41	0.0019	0.9769
TRIM23	3.93	4.3	1.29	0.0021	0.9769
TMEM102	1.74	1.23	-1.42	0.0021	0.9769
SPECC1L	3.39	3.75	1.28	0.0022	0.9769
OR56B1	2.69	2.09	-1.52	0.0023	0.9769
ATG2A	5.82	6.34	1.44	0.0024	0.9769
SNAI1	2.04	3.08	2.05	0.0025	0.9769
GADD45G	2.37	3.34	1.95	0.0025	0.9769
IER5L	1.46	2.35	1.86	0.0025	0.9769
PRPF38B	3.8	4.24	1.36	0.0025	0.9769
CHTF8	3.63	3.22	-1.33	0.0026	0.9769
FOSB	0.68	1.42	1.67	0.0026	0.9769
SIN3B	5.21	5.55	1.27	0.0027	0.9769
AKAP17A	7.15	7.56	1.33	0.0029	0.9968
GSPT2	3.71	3.38	-1.25	0.003	0.9968
CYR61	0.64	1.43	1.73	0.0033	1
ANGPTL6	4.15	3.67	-1.4	0.0033	1
PPP1R36	0.33	0	-1.26	0.0034	1
DUOX2	0.37	0	-1.29	0.0035	1
CETN2	5.1	4.78	-1.25	0.0036	1
SLC20A1	7.1	7.45	1.27	0.0036	1
PSKH1	3.78	3.36	-1.34	0.0038	1
ZNF429	3.32	2.91	-1.33	0.0038	1
ZNF764	1.97	1.37	-1.52	0.0038	1
NR1D2	3.51	3.84	1.26	0.0039	1
C16orf13	3.59	3.15	-1.36	0.004	1
NUDT9	4.12	4.53	1.32	0.004	1
NPPA	0.84	0.5	-1.27	0.0041	1
TMBIM4	4.05	3.69	-1.29	0.0042	1
ACTG1P4	2.96	2.57	-1.31	0.0045	1
FAM40A	4.04	4.38	1.26	0.0047	1
ZFAND2A	5.94	6.81	1.83	0.0047	1
DPH2	1.61	2.03	1.34	0.0047	1
FLJ39051	1	0.62	-1.31	0.0049	1
FYCO1	6.32	6.68	1.28	0.0051	1
FASN	6.64	6.25	-1.31	0.0053	1
PMF1	3.88	3.56	-1.25	0.0054	1
EFNB3	0	0.37	1.29	0.0055	1
ENPEP	0.37	0	-1.29	0.0057	1
YOD1	3.68	4.09	1.33	0.0057	1
EPS15L1	5	5.36	1.29	0.006	1
KLF4	0.27	0.71	1.36	0.0061	1
SNORA29	3.06	3.54	1.4	0.0063	1
SLC2A3	8.37	8.84	1.39	0.0065	1
MCCC1	3	2.47	-1.45	0.0066	1
SETMAR	0.49	0.11	-1.3	0.0069	1
MORC2	4.41	4.79	1.3	0.007	1
LOC149134	1.39	0.96	-1.34	0.0072	1
PPP1R32	2.17	2.73	1.48	0.0075	1
LINC00476	0.58	0.22	-1.29	0.0075	1
SAMD4B	4.22	4.56	1.27	0.008	1
FLJ40292	4.39	4.75	1.28	0.008	1
SLC7A5P2	5.31	5.81	1.42	0.008	1
NR1D1	4.01	4.37	1.28	0.0083	1
ID1	0.41	0.96	1.46	0.0083	1
CXCL2	0	0.38	1.3	0.0083	1
COX10	6.78	7.16	1.29	0.0085	1
ERVK13-1	3.12	2.67	-1.36	0.0086	1
POLD4	5.13	4.73	-1.32	0.0087	1
VEGFA	4.03	4.46	1.36	0.0087	1
CFD	0.43	0.1	-1.25	0.0087	1
HSPA1A	9.6	10.57	1.95	0.0088	1
SLC16A13	3.21	2.81	-1.33	0.0089	1
HBA2	0.54	1	1.38	0.009	1
MZT2A	4.95	4.53	-1.33	0.009	1
EAF1	6.56	6.89	1.26	0.0091	1
MSRB1	5.14	4.78	-1.28	0.0094	1
HSF2	3.28	3.71	1.35	0.0095	1
AP5M1	5.69	5.36	-1.25	0.0096	1
ID2	2.6	3.34	1.67	0.0096	1
CXCL3	0.24	0.71	1.38	0.0101	1
INGX	2.6	3.05	1.36	0.0101	1
ABCD1	2.99	2.58	-1.33	0.0103	1
KIAA0754	4.22	4.62	1.32	0.0104	1
TMEM191A	1.36	0.94	-1.34	0.0104	1
ZNF585B	2.57	2.22	-1.27	0.0105	1
CCNL2	2.89	3.3	1.33	0.0106	1
C14orf1	7.67	7.29	-1.3	0.0106	1
ZNF792	3.51	3.19	-1.25	0.0108	1
PISD	1.45	1.03	-1.33	0.0109	1
NDUFB2-AS1	0.57	1.05	1.39	0.0112	1
RUFY2	2.94	3.27	1.26	0.0113	1
GCNT7	0.65	1.04	1.32	0.0114	1
BREA2	0	0.32	1.25	0.0115	1
GCLC	4.21	4.57	1.28	0.0118	1
EP300	5.2	5.62	1.34	0.0121	1
CTSL2	0.19	0.63	1.36	0.0121	1
SAFB2	5.61	6.09	1.39	0.0122	1
FDPS	4.97	4.48	-1.4	0.0123	1
C6orf108	5.4	5.03	-1.29	0.0127	1
C18orf25	2.95	3.35	1.32	0.0128	1
TTLL1	3.19	2.87	-1.25	0.013	1
AURKC	0.66	0.29	-1.29	0.0133	1
LOC100303749	3.98	4.53	1.46	0.0133	1
TRAPPC6A	6.16	5.83	-1.26	0.0133	1
ZFYVE1	2.91	3.25	1.26	0.0137	1
METTL21D	4.32	4.76	1.36	0.0142	1
RTP4	4.32	3.97	-1.28	0.0144	1
ACBD4	2.73	2.34	-1.31	0.0145	1
CCNL1	6.36	6.73	1.29	0.0145	1
KRBA1	1.86	1.35	-1.42	0.0146	1
CIDECP	3.05	3.39	1.26	0.0149	1
BHLHE40	10.46	10.91	1.37	0.0153	1
ARMCX6	0.91	1.51	1.52	0.0161	1
NVL	2.6	2.26	-1.26	0.0161	1
ARMC6	2.5	2.16	-1.27	0.0164	1
HSPA1B	6.59	7.35	1.69	0.0166	1
LINC00263	4.91	4.56	-1.27	0.0166	1
FAM57A	2.92	2.56	-1.28	0.0172	1
SH3BP5L	1.81	1.39	-1.33	0.0173	1
CACFD1	1.29	0.85	-1.36	0.0174	1
C17orf67	3.66	3.34	-1.25	0.0177	1
NPPC	0.29	0.65	1.28	0.0179	1
NUDT6	2.97	2.39	-1.5	0.0181	1
ARHGAP30	5.7	5.36	-1.26	0.0184	1
ZNF660	0.69	0.36	-1.26	0.0186	1
GORAB	3.68	3.31	-1.29	0.0188	1
TOM1L2	2.68	3.05	1.29	0.019	1
RAB33A	5.12	4.76	-1.28	0.019	1
EXOSC8	7.06	7.42	1.28	0.0192	1
UBQLN2	7.52	7.99	1.38	0.0193	1
MAPK8IP3	5.71	6.11	1.32	0.0193	1
RASD1	1.89	3.14	2.38	0.0197	1
TMCO6	3.18	2.73	-1.37	0.02	1
SPSB3	1.65	2.08	1.35	0.0202	1
NRARP	3.49	4.13	1.56	0.0202	1
ZNF572	1.32	0.72	-1.52	0.0204	1
LOC100507547	0	0.38	1.3	0.0207	1
MAGIX	0.55	0.88	1.26	0.021	1
PPP1R15A	6.57	6.96	1.32	0.0211	1
POMT1	2.73	3.1	1.29	0.0211	1
PIM1	5.62	6.13	1.43	0.0214	1
PDPK1	4.84	5.2	1.28	0.0214	1
MRGBP	3.8	4.14	1.27	0.0217	1
EFNA4	2.51	2.15	-1.28	0.022	1
IFT27	2.84	2.5	-1.26	0.0221	1
SMG6	6.47	6.92	1.37	0.0222	1
MKNK1-AS1	1.05	0.67	-1.3	0.0224	1
ZNF302	1.39	1	-1.31	0.0225	1
UBR1	5.95	6.28	1.26	0.0232	1
P4HA1	6.48	6.15	-1.26	0.0233	1
ZNF584	2.82	2.49	-1.26	0.0233	1
CREBRF	7.68	8.15	1.39	0.0234	1
C17orf62	2.69	2.36	-1.25	0.0236	1
ZC3HAV1L	5.02	4.64	-1.3	0.0238	1
CUEDC2	2.32	1.87	-1.37	0.0243	1
C4orf36	2.12	1.66	-1.37	0.0243	1
CD52	9.78	9.4	-1.3	0.0245	1
OXLD1	4.13	3.8	-1.26	0.0249	1
NHLRC3	4.22	3.78	-1.35	0.0249	1
RGS2	4.42	5.13	1.63	0.0254	1
SNORA69	2.51	2.96	1.36	0.0256	1
HSPA8	0.52	0.84	1.26	0.0256	1
UBLCP1	3.46	3.86	1.31	0.026	1
SOCS7	4.7	5.03	1.26	0.0261	1
MORN4	2.77	2.4	-1.29	0.0263	1
CYB5D2	2.64	2.23	-1.32	0.0267	1
C11orf65	0.85	0.44	-1.32	0.0275	1
SNORA46	4.73	5.18	1.36	0.0276	1
LOC220906	3.84	3.23	-1.52	0.0277	1
UBAP1	1.76	2.12	1.29	0.0278	1
LOC148413	4.04	3.7	-1.27	0.0279	1
SNORA58	3.85	4.2	1.28	0.028	1
JAGN1	6.33	5.97	-1.28	0.0288	1
CCM2	3.46	3.12	-1.27	0.029	1
UCP2	7.25	6.85	-1.32	0.0291	1
POLR3F	1.84	1.42	-1.34	0.0295	1
HMGN3	1.88	1.53	-1.27	0.0296	1
LINC00167	1.91	2.33	1.34	0.03	1
USP30-AS1	2.63	2.09	-1.46	0.0303	1
RRAS	2.41	1.99	-1.33	0.0303	1
ZNF434	0.79	0.46	-1.25	0.0311	1
NEAT1	8.7	9.11	1.33	0.0311	1
TPPP	0.42	0	-1.34	0.0312	1
POU3F1	0.56	1.3	1.67	0.0315	1
HCG18	2.38	1.95	-1.35	0.0318	1
TNNI2	0.34	0	-1.26	0.0319	1
ZNRF3	0.67	0.33	-1.26	0.0323	1
SOWAHA	0.35	0	-1.27	0.0325	1
PRNP	0.93	1.38	1.36	0.0326	1
ZNF767	5.58	5.94	1.28	0.0327	1
LOC100216546	2.57	2.11	-1.37	0.0328	1
RSAD2	2.87	2.27	-1.52	0.033	1
NKAPP1	2.41	2.03	-1.3	0.0333	1
FADD	4.59	4.09	-1.42	0.0335	1
GRHL1	1.6	2.31	1.63	0.0337	1
ZNF583	1.64	1.3	-1.27	0.0339	1
PLK2	1.29	2.1	1.76	0.0339	1
GBA	1.96	1.62	-1.26	0.0342	1
NACA	1.07	1.51	1.36	0.0343	1
CCDC78	1.36	0.94	-1.34	0.0343	1
CAPRIN2	0.5	0.87	1.29	0.0344	1
HLA-DOA	8.03	7.67	-1.28	0.0346	1
VOPP1	4.48	4.14	-1.27	0.0347	1
BCL9L	2.95	2.38	-1.48	0.0351	1
LRRC3C	0.68	0.26	-1.34	0.0353	1
CCBP2	0.8	0.41	-1.31	0.0354	1
PCDHB9	0.95	1.33	1.31	0.0363	1
PTPLA	0.59	0.23	-1.29	0.0363	1
HSPA2	2.8	3.55	1.69	0.0365	1
ARL13B	1.69	1.34	-1.27	0.0367	1
PIN4	1.75	1.27	-1.39	0.0368	1
TF	0.46	0.83	1.3	0.0371	1
SNX30	4.65	5.04	1.31	0.0371	1
CLN8	5	5.54	1.45	0.0375	1
GBGT1	1.17	0.77	-1.32	0.0378	1
ARHGDIA	0.1	0.51	1.33	0.0379	1
CMC4	4.04	3.55	-1.4	0.0383	1
TTL	3.85	4.25	1.32	0.0386	1
HBEGF	2.28	3.2	1.9	0.0392	1
IRAK2	3.87	4.27	1.31	0.0394	1
RND1	3.02	3.59	1.49	0.0396	1
CCDC136	0.07	0.62	1.46	0.0404	1
LOC643339	1.22	0.88	-1.27	0.0413	1
CORO1A	7.39	7	-1.31	0.0415	1
ZFP3	3.01	2.55	-1.38	0.0416	1
FBXO9	0.58	0.96	1.31	0.0418	1
COL28A1	0.42	0.07	-1.28	0.0419	1
MAD1L1	3.67	4.03	1.28	0.0419	1
DSCC1	2.6	2.26	-1.26	0.0423	1
LOC399744	2.13	2.72	1.5	0.0424	1
GLB1L	0.99	0.62	-1.29	0.0426	1
RASL11A	0.83	1.3	1.38	0.0427	1
CCDC17	1.07	0.72	-1.28	0.043	1
ZNF790-AS1	1.26	0.86	-1.32	0.0433	1
ZBTB25	5.41	5.75	1.26	0.0433	1
ADRB2	0.62	1.12	1.41	0.0434	1
GLO1	8.13	7.79	-1.27	0.0436	1
TSPO	2.39	1.92	-1.39	0.0436	1
LPPR2	1.33	1.79	1.37	0.0438	1
PPEF1	0.98	0.54	-1.35	0.0441	1
CDCA4	1.51	1.15	-1.28	0.0448	1
RBM20	1.2	0.8	-1.32	0.0469	1
TRPV2	3.82	3.47	-1.27	0.0471	1
COL2A1	0.77	1.1	1.26	0.0472	1
UROS	2.86	2.26	-1.52	0.0478	1
ILDR2	0.87	0.35	-1.43	0.0481	1
LY9	4.72	5.06	1.27	0.0485	1

## Sheet: Up
ID	Control: DMSO Avg (log2)	Control: Allo Avg (log2)	Fold Change	P-val	FDR P-val
RASD1	1.89	3.14	2.38	0.0197	1
SNAI1	2.04	3.08	2.05	0.0025	0.9769
GADD45G	2.37	3.34	1.95	0.0025	0.9769
HSPA1A	9.6	10.57	1.95	0.0088	1
DUSP1	5.4	6.35	1.93	0.0004	0.7173
HBEGF	2.28	3.2	1.9	0.0392	1
IER5L	1.46	2.35	1.86	0.0025	0.9769
ZFAND2A	5.94	6.81	1.83	0.0047	1
PLK2	1.29	2.1	1.76	0.0339	1
CYR61	0.64	1.43	1.73	0.0033	1
HSPA1B	6.59	7.35	1.69	0.0166	1
HSPA2	2.8	3.55	1.69	0.0365	1
LOC401127	0.75	1.5	1.67	0.0003	0.7173
FOSB	0.68	1.42	1.67	0.0026	0.9769
ID2	2.6	3.34	1.67	0.0096	1
POU3F1	0.56	1.3	1.67	0.0315	1
RGS2	4.42	5.13	1.63	0.0254	1
GRHL1	1.6	2.31	1.63	0.0337	1
MAFB	0	0.66	1.58	6.36e-05	0.5538
C1orf63	3.11	3.76	1.56	2.29e-05	0.4694
NRARP	3.49	4.13	1.56	0.0202	1
ZBTB43	4.29	4.93	1.55	0.0001	0.5538
ARMCX6	0.91	1.51	1.52	0.0161	1
NDUFAF4P1	1.86	2.44	1.5	0.0012	0.9769
LOC399744	2.13	2.72	1.5	0.0424	1
RND1	3.02	3.59	1.49	0.0396	1
PPP1R32	2.17	2.73	1.48	0.0075	1
KCNV2	0.18	0.74	1.47	0.0005	0.92
ID1	0.41	0.96	1.46	0.0083	1
LOC100303749	3.98	4.53	1.46	0.0133	1
CCDC136	0.07	0.62	1.46	0.0404	1
CLN8	5	5.54	1.45	0.0375	1
FOXC1	0	0.53	1.44	0.0012	0.9769
ATG2A	5.82	6.34	1.44	0.0024	0.9769
PIM1	5.62	6.13	1.43	0.0214	1
ARC	0.09	0.59	1.42	0.0003	0.7173
PGM3	4.39	4.9	1.42	0.0004	0.7173
SLC7A5P2	5.31	5.81	1.42	0.008	1
ADRB2	0.62	1.12	1.41	0.0434	1
RSRC2	5.98	6.47	1.4	0.0013	0.9769
SNORA29	3.06	3.54	1.4	0.0063	1
SWT1	1.17	1.64	1.39	0.001	0.9769
SLC2A3	8.37	8.84	1.39	0.0065	1
NDUFB2-AS1	0.57	1.05	1.39	0.0112	1
SAFB2	5.61	6.09	1.39	0.0122	1
CREBRF	7.68	8.15	1.39	0.0234	1
HBA2	0.54	1	1.38	0.009	1
CXCL3	0.24	0.71	1.38	0.0101	1
UBQLN2	7.52	7.99	1.38	0.0193	1
RASL11A	0.83	1.3	1.38	0.0427	1
BHLHE40	10.46	10.91	1.37	0.0153	1
SMG6	6.47	6.92	1.37	0.0222	1
LPPR2	1.33	1.79	1.37	0.0438	1
PRPF38B	3.8	4.24	1.36	0.0025	0.9769
KLF4	0.27	0.71	1.36	0.0061	1
VEGFA	4.03	4.46	1.36	0.0087	1
INGX	2.6	3.05	1.36	0.0101	1
CTSL2	0.19	0.63	1.36	0.0121	1
METTL21D	4.32	4.76	1.36	0.0142	1
SNORA69	2.51	2.96	1.36	0.0256	1
SNORA46	4.73	5.18	1.36	0.0276	1
PRNP	0.93	1.38	1.36	0.0326	1
NACA	1.07	1.51	1.36	0.0343	1
SAT2	5.14	5.57	1.35	0.0003	0.7173
HSF2	3.28	3.71	1.35	0.0095	1
SPSB3	1.65	2.08	1.35	0.0202	1
DPH2	1.61	2.03	1.34	0.0047	1
EP300	5.2	5.62	1.34	0.0121	1
LINC00167	1.91	2.33	1.34	0.03	1
AKAP17A	7.15	7.56	1.33	0.0029	0.9968
YOD1	3.68	4.09	1.33	0.0057	1
CCNL2	2.89	3.3	1.33	0.0106	1
NEAT1	8.7	9.11	1.33	0.0311	1
ARHGDIA	0.1	0.51	1.33	0.0379	1
NUDT9	4.12	4.53	1.32	0.004	1
KIAA0754	4.22	4.62	1.32	0.0104	1
GCNT7	0.65	1.04	1.32	0.0114	1
C18orf25	2.95	3.35	1.32	0.0128	1
MAPK8IP3	5.71	6.11	1.32	0.0193	1
PPP1R15A	6.57	6.96	1.32	0.0211	1
TTL	3.85	4.25	1.32	0.0386	1
PRKAR2B	0	0.39	1.31	0.001	0.9769
UBLCP1	3.46	3.86	1.31	0.026	1
PCDHB9	0.95	1.33	1.31	0.0363	1
SNX30	4.65	5.04	1.31	0.0371	1
IRAK2	3.87	4.27	1.31	0.0394	1
FBXO9	0.58	0.96	1.31	0.0418	1
GMEB2	4.99	5.37	1.3	0.0009	0.9769
COPS3	4.42	4.8	1.3	0.0015	0.9769
MORC2	4.41	4.79	1.3	0.007	1
CXCL2	0	0.38	1.3	0.0083	1
LOC100507547	0	0.38	1.3	0.0207	1
TF	0.46	0.83	1.3	0.0371	1
IFT172	4.41	4.78	1.29	0.0016	0.9769
TRIM23	3.93	4.3	1.29	0.0021	0.9769
EFNB3	0	0.37	1.29	0.0055	1
EPS15L1	5	5.36	1.29	0.006	1
COX10	6.78	7.16	1.29	0.0085	1
CCNL1	6.36	6.73	1.29	0.0145	1
TOM1L2	2.68	3.05	1.29	0.019	1
POMT1	2.73	3.1	1.29	0.0211	1
UBAP1	1.76	2.12	1.29	0.0278	1
CAPRIN2	0.5	0.87	1.29	0.0344	1
PANK4	5.65	6	1.28	0.0008	0.9769
MXD1	3.74	4.1	1.28	0.0018	0.9769
SPECC1L	3.39	3.75	1.28	0.0022	0.9769
FYCO1	6.32	6.68	1.28	0.0051	1
FLJ40292	4.39	4.75	1.28	0.008	1
NR1D1	4.01	4.37	1.28	0.0083	1
GCLC	4.21	4.57	1.28	0.0118	1
NPPC	0.29	0.65	1.28	0.0179	1
EXOSC8	7.06	7.42	1.28	0.0192	1
PDPK1	4.84	5.2	1.28	0.0214	1
SNORA58	3.85	4.2	1.28	0.028	1
ZNF767	5.58	5.94	1.28	0.0327	1
MAD1L1	3.67	4.03	1.28	0.0419	1
LUC7L	5.25	5.59	1.27	0.0017	0.9769
SIN3B	5.21	5.55	1.27	0.0027	0.9769
SLC20A1	7.1	7.45	1.27	0.0036	1
SAMD4B	4.22	4.56	1.27	0.008	1
MRGBP	3.8	4.14	1.27	0.0217	1
LY9	4.72	5.06	1.27	0.0485	1
NR1D2	3.51	3.84	1.26	0.0039	1
FAM40A	4.04	4.38	1.26	0.0047	1
EAF1	6.56	6.89	1.26	0.0091	1
RUFY2	2.94	3.27	1.26	0.0113	1
ZFYVE1	2.91	3.25	1.26	0.0137	1
CIDECP	3.05	3.39	1.26	0.0149	1
MAGIX	0.55	0.88	1.26	0.021	1
UBR1	5.95	6.28	1.26	0.0232	1
HSPA8	0.52	0.84	1.26	0.0256	1
SOCS7	4.7	5.03	1.26	0.0261	1
ZBTB25	5.41	5.75	1.26	0.0433	1
COL2A1	0.77	1.1	1.26	0.0472	1
BREA2	0	0.32	1.25	0.0115	1

## Sheet: Down
ID	Control: DMSO Avg (log2)	Control: Allo Avg (log2)	Fold Change	P-val	FDR P-val
OR56B1	2.69	2.09	-1.52	0.0023	0.9769
ZNF764	1.97	1.37	-1.52	0.0038	1
ZNF572	1.32	0.72	-1.52	0.0204	1
LOC220906	3.84	3.23	-1.52	0.0277	1
RSAD2	2.87	2.27	-1.52	0.033	1
UROS	2.86	2.26	-1.52	0.0478	1
NUDT6	2.97	2.39	-1.5	0.0181	1
DHCR7	5.31	4.75	-1.48	0.0018	0.9769
BCL9L	2.95	2.38	-1.48	0.0351	1
USP30-AS1	2.63	2.09	-1.46	0.0303	1
MCCC1	3	2.47	-1.45	0.0066	1
ILDR2	0.87	0.35	-1.43	0.0481	1
TMEM102	1.74	1.23	-1.42	0.0021	0.9769
KRBA1	1.86	1.35	-1.42	0.0146	1
FADD	4.59	4.09	-1.42	0.0335	1
LOC100499194	1.78	1.28	-1.41	0.0019	0.9769
ZNF790	1.42	0.93	-1.4	0.0012	0.9769
ANGPTL6	4.15	3.67	-1.4	0.0033	1
FDPS	4.97	4.48	-1.4	0.0123	1
CMC4	4.04	3.55	-1.4	0.0383	1
PIN4	1.75	1.27	-1.39	0.0368	1
TSPO	2.39	1.92	-1.39	0.0436	1
EGLN2	4.12	3.66	-1.38	9e-05	0.5538
SQLE	5.52	5.05	-1.38	0.0007	0.9769
ZFP3	3.01	2.55	-1.38	0.0416	1
TMCO6	3.18	2.73	-1.37	0.02	1
CUEDC2	2.32	1.87	-1.37	0.0243	1
C4orf36	2.12	1.66	-1.37	0.0243	1
LOC100216546	2.57	2.11	-1.37	0.0328	1
C16orf13	3.59	3.15	-1.36	0.004	1
ERVK13-1	3.12	2.67	-1.36	0.0086	1
CACFD1	1.29	0.85	-1.36	0.0174	1
NHLRC3	4.22	3.78	-1.35	0.0249	1
HCG18	2.38	1.95	-1.35	0.0318	1
PPEF1	0.98	0.54	-1.35	0.0441	1
PSKH1	3.78	3.36	-1.34	0.0038	1
LOC149134	1.39	0.96	-1.34	0.0072	1
TMEM191A	1.36	0.94	-1.34	0.0104	1
POLR3F	1.84	1.42	-1.34	0.0295	1
TPPP	0.42	0	-1.34	0.0312	1
CCDC78	1.36	0.94	-1.34	0.0343	1
LRRC3C	0.68	0.26	-1.34	0.0353	1
CHTF8	3.63	3.22	-1.33	0.0026	0.9769
ZNF429	3.32	2.91	-1.33	0.0038	1
SLC16A13	3.21	2.81	-1.33	0.0089	1
MZT2A	4.95	4.53	-1.33	0.009	1
ABCD1	2.99	2.58	-1.33	0.0103	1
PISD	1.45	1.03	-1.33	0.0109	1
SH3BP5L	1.81	1.39	-1.33	0.0173	1
RRAS	2.41	1.99	-1.33	0.0303	1
POLD4	5.13	4.73	-1.32	0.0087	1
CYB5D2	2.64	2.23	-1.32	0.0267	1
C11orf65	0.85	0.44	-1.32	0.0275	1
UCP2	7.25	6.85	-1.32	0.0291	1
GBGT1	1.17	0.77	-1.32	0.0378	1
ZNF790-AS1	1.26	0.86	-1.32	0.0433	1
RBM20	1.2	0.8	-1.32	0.0469	1
ACTG1P4	2.96	2.57	-1.31	0.0045	1
FLJ39051	1	0.62	-1.31	0.0049	1
FASN	6.64	6.25	-1.31	0.0053	1
ACBD4	2.73	2.34	-1.31	0.0145	1
ZNF302	1.39	1	-1.31	0.0225	1
CCBP2	0.8	0.41	-1.31	0.0354	1
CORO1A	7.39	7	-1.31	0.0415	1
SETMAR	0.49	0.11	-1.3	0.0069	1
C14orf1	7.67	7.29	-1.3	0.0106	1
MKNK1-AS1	1.05	0.67	-1.3	0.0224	1
ZC3HAV1L	5.02	4.64	-1.3	0.0238	1
CD52	9.78	9.4	-1.3	0.0245	1
NKAPP1	2.41	2.03	-1.3	0.0333	1
DUOX2	0.37	0	-1.29	0.0035	1
TMBIM4	4.05	3.69	-1.29	0.0042	1
ENPEP	0.37	0	-1.29	0.0057	1
LINC00476	0.58	0.22	-1.29	0.0075	1
C6orf108	5.4	5.03	-1.29	0.0127	1
AURKC	0.66	0.29	-1.29	0.0133	1
GORAB	3.68	3.31	-1.29	0.0188	1
MORN4	2.77	2.4	-1.29	0.0263	1
PTPLA	0.59	0.23	-1.29	0.0363	1
GLB1L	0.99	0.62	-1.29	0.0426	1
C14orf28	3.9	3.54	-1.28	0.0008	0.9769
NCDN	2.6	2.24	-1.28	0.0013	0.9769
MSRB1	5.14	4.78	-1.28	0.0094	1
RTP4	4.32	3.97	-1.28	0.0144	1
FAM57A	2.92	2.56	-1.28	0.0172	1
RAB33A	5.12	4.76	-1.28	0.019	1
EFNA4	2.51	2.15	-1.28	0.022	1
JAGN1	6.33	5.97	-1.28	0.0288	1
HLA-DOA	8.03	7.67	-1.28	0.0346	1
COL28A1	0.42	0.07	-1.28	0.0419	1
CCDC17	1.07	0.72	-1.28	0.043	1
CDCA4	1.51	1.15	-1.28	0.0448	1
NPPA	0.84	0.5	-1.27	0.0041	1
ZNF585B	2.57	2.22	-1.27	0.0105	1
ARMC6	2.5	2.16	-1.27	0.0164	1
LINC00263	4.91	4.56	-1.27	0.0166	1
LOC148413	4.04	3.7	-1.27	0.0279	1
CCM2	3.46	3.12	-1.27	0.029	1
HMGN3	1.88	1.53	-1.27	0.0296	1
SOWAHA	0.35	0	-1.27	0.0325	1
ZNF583	1.64	1.3	-1.27	0.0339	1
VOPP1	4.48	4.14	-1.27	0.0347	1
ARL13B	1.69	1.34	-1.27	0.0367	1
LOC643339	1.22	0.88	-1.27	0.0413	1
GLO1	8.13	7.79	-1.27	0.0436	1
TRPV2	3.82	3.47	-1.27	0.0471	1
ZNF184	1.88	1.54	-1.26	0.0015	0.9769
PPP1R36	0.33	0	-1.26	0.0034	1
TRAPPC6A	6.16	5.83	-1.26	0.0133	1
NVL	2.6	2.26	-1.26	0.0161	1
ARHGAP30	5.7	5.36	-1.26	0.0184	1
ZNF660	0.69	0.36	-1.26	0.0186	1
IFT27	2.84	2.5	-1.26	0.0221	1
P4HA1	6.48	6.15	-1.26	0.0233	1
ZNF584	2.82	2.49	-1.26	0.0233	1
OXLD1	4.13	3.8	-1.26	0.0249	1
TNNI2	0.34	0	-1.26	0.0319	1
ZNRF3	0.67	0.33	-1.26	0.0323	1
GBA	1.96	1.62	-1.26	0.0342	1
DSCC1	2.6	2.26	-1.26	0.0423	1
GSPT2	3.71	3.38	-1.25	0.003	0.9968
CETN2	5.1	4.78	-1.25	0.0036	1
PMF1	3.88	3.56	-1.25	0.0054	1
CFD	0.43	0.1	-1.25	0.0087	1
AP5M1	5.69	5.36	-1.25	0.0096	1
ZNF792	3.51	3.19	-1.25	0.0108	1
TTLL1	3.19	2.87	-1.25	0.013	1
C17orf67	3.66	3.34	-1.25	0.0177	1
C17orf62	2.69	2.36	-1.25	0.0236	1
ZNF434	0.79	0.46	-1.25	0.0311	1
