# Supplementary material for: Divergent Transcriptomic Effects of Allopregnanolone in Postpartum Depression
Source: Genes (Basel). 2023 Jun 8;14(6):1234. doi: 10.3390/genes14061234 (PMC10298697; doi:10.3390/genes14061234)
Supplement: Supplementary file 1 [file genes-14-01234-s001.zip › TableS4_PPD_AllovDMSO.xlsx]

## Sheet: PPD_AllovDMSO
ID	PPD: DMSO Avg (log2)	PPD: Allo Avg (log2)	Fold Change	P-val	FDR P-val	Gene Symbol
ZNF473	2.89	3.23	1.27	0.0007	1	ZNF473
UPF1	4.61	4.98	1.29	0.0009	1	UPF1
GOLGA6L5	1.78	2.47	1.61	0.0015	1	GOLGA6L5
SLC52A2	3.11	3.5	1.31	0.0022	1	SLC52A2
AP4B1	2.23	2.7	1.39	0.0029	1	AP4B1
FOXJ3	5.33	5.67	1.27	0.0033	1	FOXJ3
ZFP64	3.8	4.15	1.28	0.0037	1	ZFP64
DFFB	1.4	1.8	1.33	0.0039	1	DFFB
BRD7P3	1.39	1.76	1.29	0.0042	1	BRD7P3
INO80D	5.75	6.2	1.37	0.0042	1	INO80D
XPNPEP3	4.58	4.99	1.32	0.0054	1	XPNPEP3
MSL2	5.93	6.26	1.26	0.0066	1	MSL2
CLPTM1L	0.35	0.69	1.27	0.0066	1	CLPTM1L
SZT2	6.21	6.55	1.27	0.0096	1	SZT2
RFX1	3.98	4.35	1.29	0.0099	1	RFX1
ZBTB46	1.92	2.32	1.31	0.0099	1	ZBTB46
ENTPD6	1.8	2.15	1.28	0.0101	1	ENTPD6
OSBPL7	3.16	3.53	1.29	0.0113	1	OSBPL7
LEPROTL1	3.96	3.6	-1.28	0.0113	1	LEPROTL1
TRAF3IP3	3.63	3.15	-1.39	0.0117	1	TRAF3IP3
SRRM2	10.5	10.92	1.33	0.0119	1	SRRM2
HDAC6	2.69	3.03	1.26	0.0126	1	HDAC6
ANKRD23	4.24	4.59	1.27	0.0128	1	ANKRD23
CARS	1.98	2.35	1.3	0.013	1	CARS
BACH1	3.7	4.12	1.33	0.014	1	BACH1
ZNF546	3.16	2.58	-1.5	0.014	1	ZNF546
DDX39A	6.4	6.78	1.3	0.0143	1	DDX39A
MORC2	4.41	4.79	1.3	0.0145	1	MORC2
P4HTM	3.84	4.29	1.37	0.0147	1	P4HTM
BTBD19	0.7	0.35	-1.27	0.015	1	BTBD19
MAD1L1	3.76	4.11	1.27	0.016	1	MAD1L1
SNORA56	1.84	2.29	1.37	0.016	1	SNORA56
TMEM91	0.27	0.7	1.35	0.0163	1	TMEM91
MECR	1.08	1.52	1.35	0.0166	1	MECR
FYCO1	6.4	6.78	1.3	0.0173	1	FYCO1
ZNF343	0.73	1.15	1.33	0.0173	1	ZNF343
C19orf6	5.99	6.32	1.25	0.0173	1	C19orf6
MAP6D1	0.51	0.16	-1.27	0.0174	1	MAP6D1
TTLL4	4.97	5.31	1.26	0.0186	1	TTLL4
IFFO1	2.4	2.82	1.34	0.0187	1	IFFO1
KIAA1704	4.17	3.84	-1.25	0.019	1	KIAA1704
NCAPH	2.17	2.6	1.34	0.0195	1	NCAPH
SMURF1	2.94	3.26	1.25	0.0201	1	SMURF1
NACAD	0	0.34	1.26	0.0206	1	NACAD
C1orf200	1.16	1.64	1.39	0.021	1	C1orf200
SYNGAP1	4.23	4.55	1.25	0.0215	1	SYNGAP1
PIGA	2.22	2.59	1.29	0.0216	1	PIGA
FLJ39051	0.82	0.45	-1.29	0.0216	1	FLJ39051
LAMA5	0.83	1.55	1.65	0.022	1	LAMA5
BEST4	0.15	0.55	1.32	0.0225	1	BEST4
LINS	2.43	2.81	1.3	0.0234	1	LINS
SNORA19	2.24	2.68	1.36	0.0242	1	SNORA19
ABHD11	0.81	0.49	-1.26	0.0243	1	ABHD11
FAM182A	0	0.39	1.31	0.0254	1	FAM182A
ZNF610	2.58	2.16	-1.33	0.0264	1	ZNF610
GALNS	1.94	2.36	1.34	0.0269	1	GALNS
GIN1	2.57	2.15	-1.33	0.0272	1	GIN1
KIAA0895L	4.04	4.44	1.31	0.0278	1	KIAA0895L
MAP3K10	4.55	4.92	1.29	0.0283	1	MAP3K10
SNX21	0.86	0.54	-1.25	0.0286	1	SNX21
PFDN4	6.26	5.9	-1.28	0.0293	1	PFDN4
Sep15	6.96	6.5	-1.38	0.0296	1	2022-09-15
CTNS	2.75	3.15	1.31	0.0297	1	CTNS
BZRAP1	1.2	1.59	1.31	0.0303	1	BZRAP1
NAPA-AS1	3.55	3.19	-1.28	0.0308	1	NAPA-AS1
OXSM	3.75	3.28	-1.39	0.031	1	OXSM
RDH10	1.24	1.62	1.3	0.0317	1	RDH10
FARS2	3.6	4.05	1.36	0.0317	1	FARS2
C8orf73	0.42	0.88	1.38	0.0318	1	C8orf73
C7orf61	0.87	1.35	1.39	0.0318	1	C7orf61
NCOR1	3.96	4.36	1.32	0.0328	1	NCOR1
IRGQ	1.98	1.65	-1.25	0.0336	1	IRGQ
CDC25C	2.96	2.44	-1.43	0.0336	1	CDC25C
NEDD1	3.43	3.08	-1.27	0.0336	1	NEDD1
ANKRD54	2.41	2.8	1.31	0.0346	1	ANKRD54
ZNF692	4.89	5.27	1.31	0.0347	1	ZNF692
MAPK8IP3	5.74	6.12	1.3	0.035	1	MAPK8IP3
HSPA8	0.4	0.82	1.34	0.0351	1	HSPA8
SMG6	6.62	7.02	1.33	0.0358	1	SMG6
RBM14	3.86	4.18	1.25	0.0373	1	RBM14
DKFZP434I0714	4.28	3.94	-1.26	0.0377	1	DKFZP434I0714
MTTP	0.38	0	-1.3	0.0387	1	MTTP
SMAD3	5.42	5.76	1.26	0.0388	1	SMAD3
NLRP1	3.01	3.64	1.55	0.0407	1	NLRP1
HSCB	3.41	3.02	-1.31	0.0417	1	HSCB
SCAI	2.58	2.95	1.3	0.0427	1	SCAI
ZP3	1.77	2.19	1.34	0.043	1	ZP3
TRAF6	3.43	3.75	1.25	0.0435	1	TRAF6
ARC	0	0.44	1.36	0.0435	1	ARC
NACA	1.09	1.72	1.55	0.044	1	NACA
TMEM107	1.33	1.68	1.27	0.0441	1	TMEM107
RAB11FIP3	4.6	4.98	1.3	0.0442	1	RAB11FIP3
KCNV2	0	0.41	1.33	0.0446	1	KCNV2
SNAI1	1.95	2.58	1.54	0.0452	1	SNAI1
GIT1	2.05	2.57	1.43	0.0453	1	GIT1
HEATR7A	3.9	4.25	1.28	0.0456	1	HEATR7A
CCDC69	7.51	7.85	1.27	0.0459	1	CCDC69
SH2D5	0	0.38	1.3	0.0496	1	SH2D5

## Sheet: Up
ID	PPD: DMSO Avg (log2)	PPD: Allo Avg (log2)	Fold Change	P-val	FDR P-val
C19orf6	5.99	6.32	1.25	0.0173	1
SMURF1	2.94	3.26	1.25	0.0201	1
SYNGAP1	4.23	4.55	1.25	0.0215	1
RBM14	3.86	4.18	1.25	0.0373	1
TRAF6	3.43	3.75	1.25	0.0435	1
MSL2	5.93	6.26	1.26	0.0066	1
HDAC6	2.69	3.03	1.26	0.0126	1
TTLL4	4.97	5.31	1.26	0.0186	1
NACAD	0	0.34	1.26	0.0206	1
SMAD3	5.42	5.76	1.26	0.0388	1
ZNF473	2.89	3.23	1.27	0.0007	1
FOXJ3	5.33	5.67	1.27	0.0033	1
CLPTM1L	0.35	0.69	1.27	0.0066	1
SZT2	6.21	6.55	1.27	0.0096	1
ANKRD23	4.24	4.59	1.27	0.0128	1
MAD1L1	3.76	4.11	1.27	0.016	1
TMEM107	1.33	1.68	1.27	0.0441	1
CCDC69	7.51	7.85	1.27	0.0459	1
ZFP64	3.8	4.15	1.28	0.0037	1
ENTPD6	1.8	2.15	1.28	0.0101	1
HEATR7A	3.9	4.25	1.28	0.0456	1
UPF1	4.61	4.98	1.29	0.0009	1
BRD7P3	1.39	1.76	1.29	0.0042	1
RFX1	3.98	4.35	1.29	0.0099	1
OSBPL7	3.16	3.53	1.29	0.0113	1
PIGA	2.22	2.59	1.29	0.0216	1
MAP3K10	4.55	4.92	1.29	0.0283	1
CARS	1.98	2.35	1.3	0.013	1
DDX39A	6.4	6.78	1.3	0.0143	1
MORC2	4.41	4.79	1.3	0.0145	1
FYCO1	6.4	6.78	1.3	0.0173	1
LINS	2.43	2.81	1.3	0.0234	1
RDH10	1.24	1.62	1.3	0.0317	1
MAPK8IP3	5.74	6.12	1.3	0.035	1
SCAI	2.58	2.95	1.3	0.0427	1
RAB11FIP3	4.6	4.98	1.3	0.0442	1
SH2D5	0	0.38	1.3	0.0496	1
SLC52A2	3.11	3.5	1.31	0.0022	1
ZBTB46	1.92	2.32	1.31	0.0099	1
FAM182A	0	0.39	1.31	0.0254	1
KIAA0895L	4.04	4.44	1.31	0.0278	1
CTNS	2.75	3.15	1.31	0.0297	1
BZRAP1	1.2	1.59	1.31	0.0303	1
ANKRD54	2.41	2.8	1.31	0.0346	1
ZNF692	4.89	5.27	1.31	0.0347	1
XPNPEP3	4.58	4.99	1.32	0.0054	1
BEST4	0.15	0.55	1.32	0.0225	1
NCOR1	3.96	4.36	1.32	0.0328	1
DFFB	1.4	1.8	1.33	0.0039	1
SRRM2	10.5	10.92	1.33	0.0119	1
BACH1	3.7	4.12	1.33	0.014	1
ZNF343	0.73	1.15	1.33	0.0173	1
SMG6	6.62	7.02	1.33	0.0358	1
KCNV2	0	0.41	1.33	0.0446	1
IFFO1	2.4	2.82	1.34	0.0187	1
NCAPH	2.17	2.6	1.34	0.0195	1
GALNS	1.94	2.36	1.34	0.0269	1
HSPA8	0.4	0.82	1.34	0.0351	1
ZP3	1.77	2.19	1.34	0.043	1
TMEM91	0.27	0.7	1.35	0.0163	1
MECR	1.08	1.52	1.35	0.0166	1
SNORA19	2.24	2.68	1.36	0.0242	1
FARS2	3.6	4.05	1.36	0.0317	1
ARC	0	0.44	1.36	0.0435	1
INO80D	5.75	6.2	1.37	0.0042	1
P4HTM	3.84	4.29	1.37	0.0147	1
SNORA56	1.84	2.29	1.37	0.016	1
C8orf73	0.42	0.88	1.38	0.0318	1
AP4B1	2.23	2.7	1.39	0.0029	1
C1orf200	1.16	1.64	1.39	0.021	1
C7orf61	0.87	1.35	1.39	0.0318	1
GIT1	2.05	2.57	1.43	0.0453	1
SNAI1	1.95	2.58	1.54	0.0452	1
NLRP1	3.01	3.64	1.55	0.0407	1
NACA	1.09	1.72	1.55	0.044	1
GOLGA6L5	1.78	2.47	1.61	0.0015	1
LAMA5	0.83	1.55	1.65	0.022	1

## Sheet: down
ID	PPD: DMSO Avg (log2)	PPD: Allo Avg (log2)	Fold Change	P-val	FDR P-val
ZNF546	3.16	2.58	-1.5	0.014	1
CDC25C	2.96	2.44	-1.43	0.0336	1
TRAF3IP3	3.63	3.15	-1.39	0.0117	1
OXSM	3.75	3.28	-1.39	0.031	1
Sep15	6.96	6.5	-1.38	0.0296	1
ZNF610	2.58	2.16	-1.33	0.0264	1
GIN1	2.57	2.15	-1.33	0.0272	1
HSCB	3.41	3.02	-1.31	0.0417	1
MTTP	0.38	0	-1.3	0.0387	1
FLJ39051	0.82	0.45	-1.29	0.0216	1
LEPROTL1	3.96	3.6	-1.28	0.0113	1
PFDN4	6.26	5.9	-1.28	0.0293	1
NAPA-AS1	3.55	3.19	-1.28	0.0308	1
BTBD19	0.7	0.35	-1.27	0.015	1
MAP6D1	0.51	0.16	-1.27	0.0174	1
NEDD1	3.43	3.08	-1.27	0.0336	1
ABHD11	0.81	0.49	-1.26	0.0243	1
DKFZP434I0714	4.28	3.94	-1.26	0.0377	1
KIAA1704	4.17	3.84	-1.25	0.019	1
SNX21	0.86	0.54	-1.25	0.0286	1
IRGQ	1.98	1.65	-1.25	0.0336	1
